# Supplementary material
Source: publisher site journal article supplement (https://www.dovepress.com/article/297149)
Supplement: Supplementary file 1 [file get_supplementary_file.php]

[R]

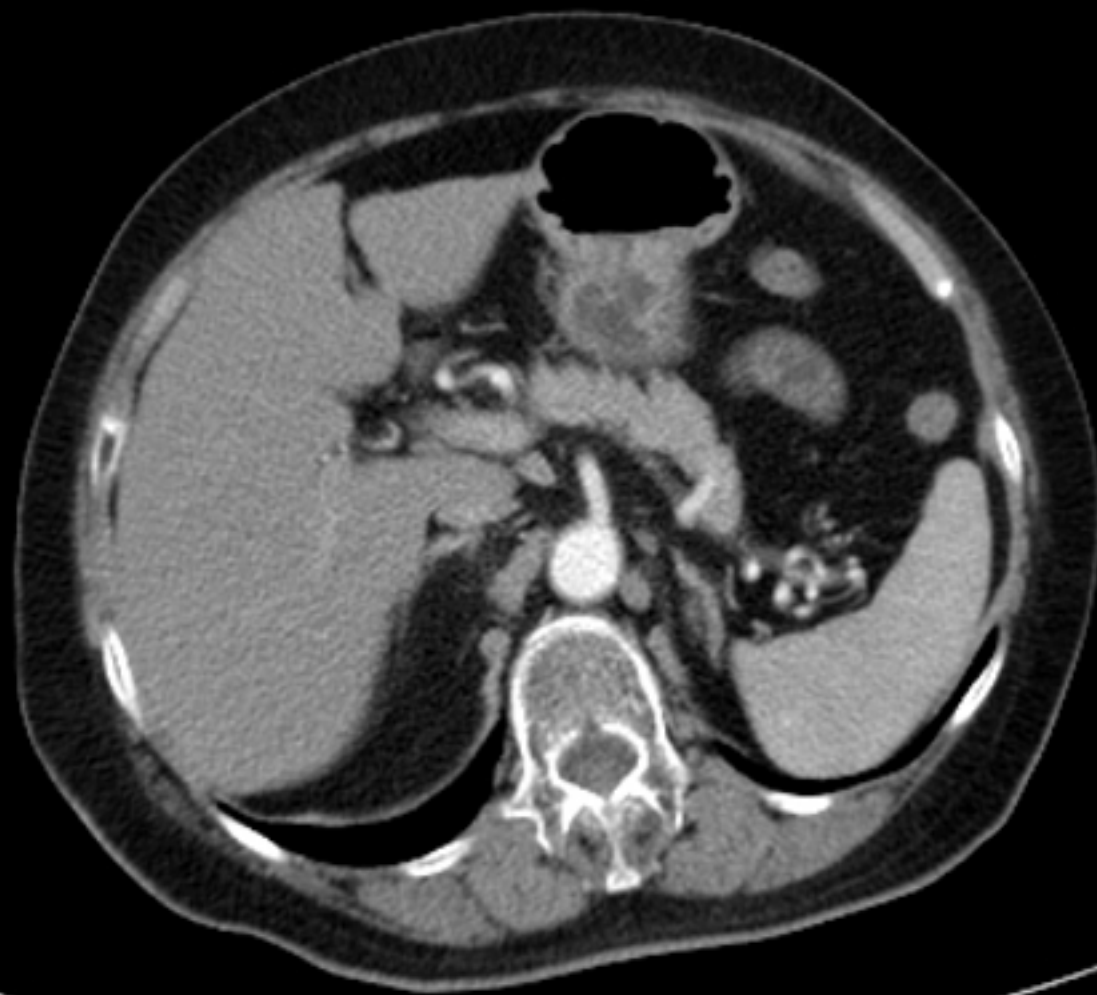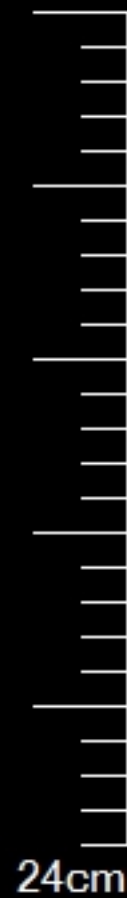

[P]

[R]

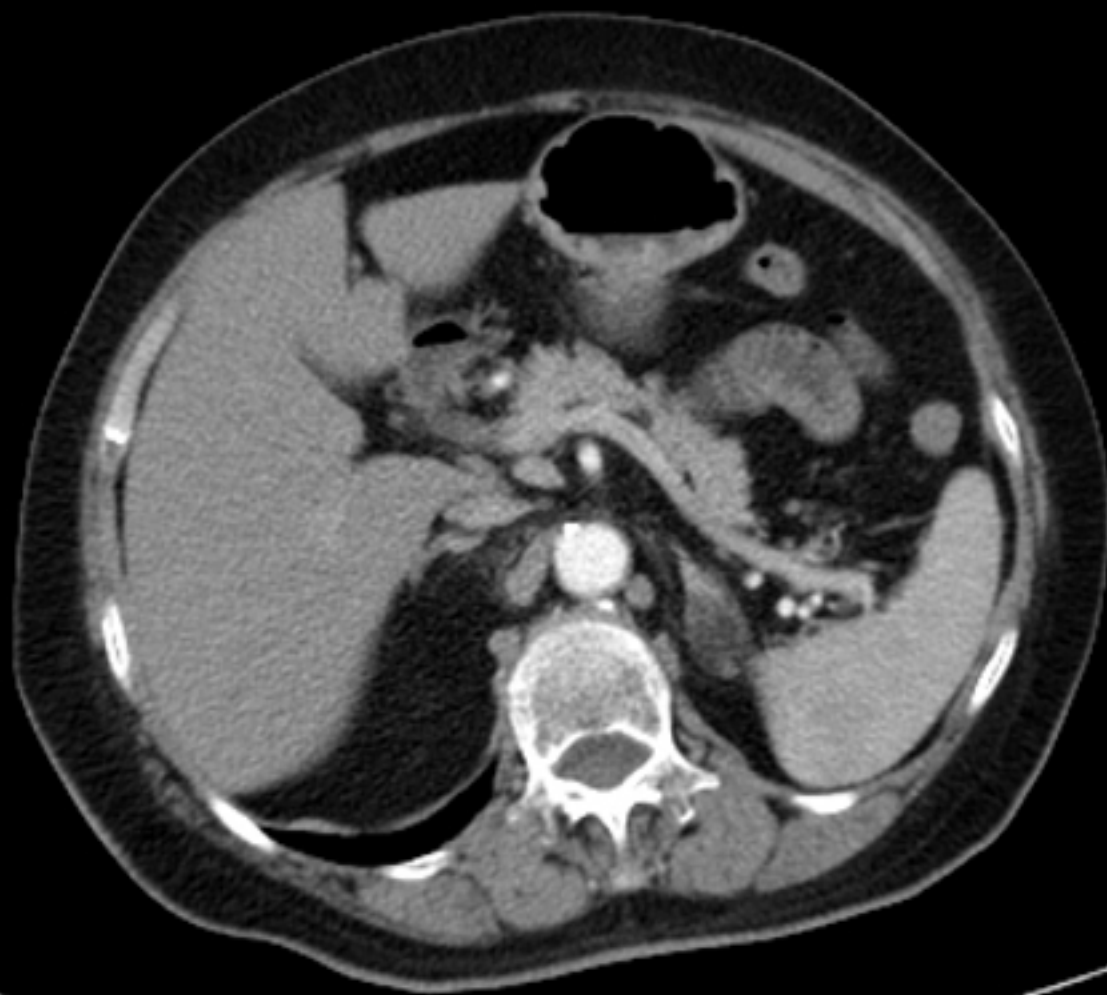

[P]

[R]

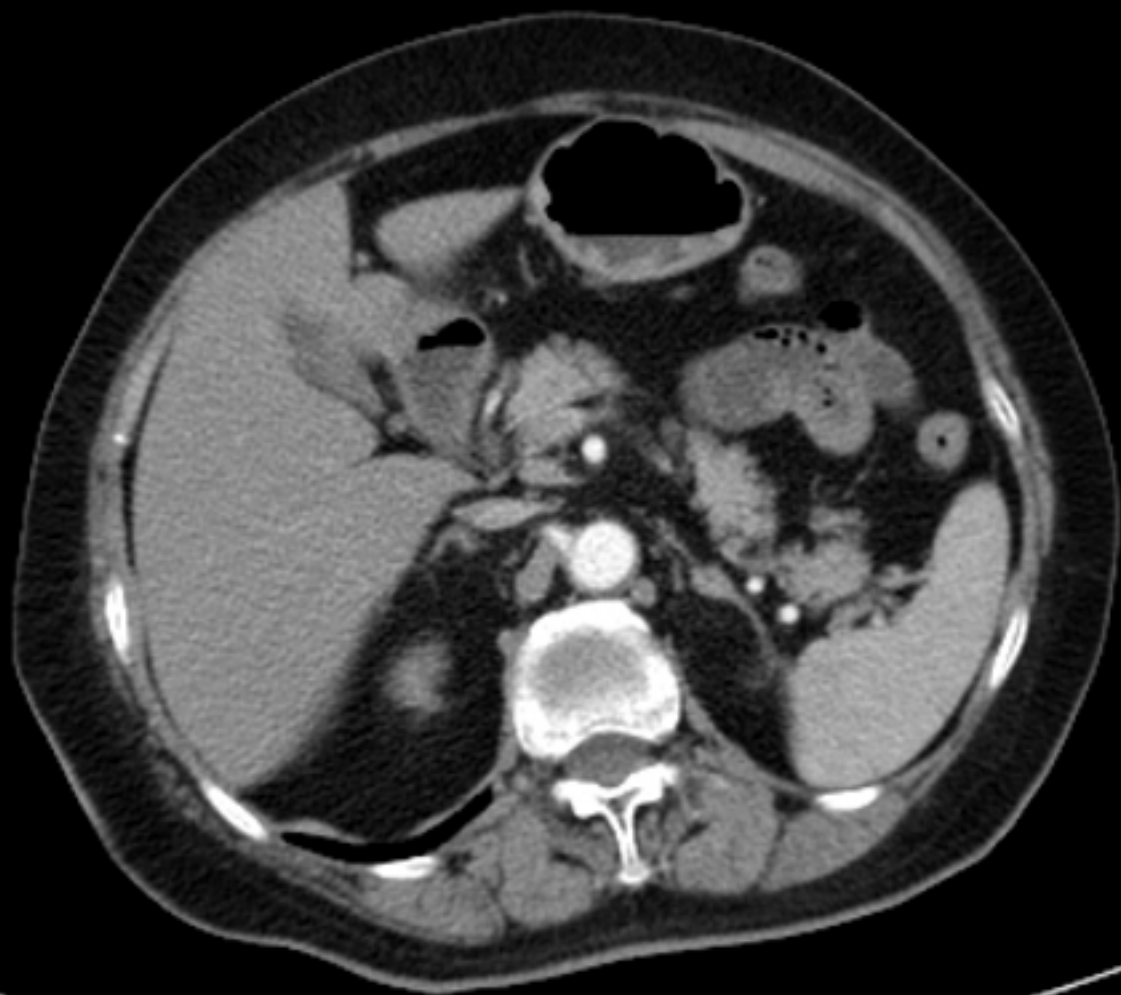

[P]

[R]

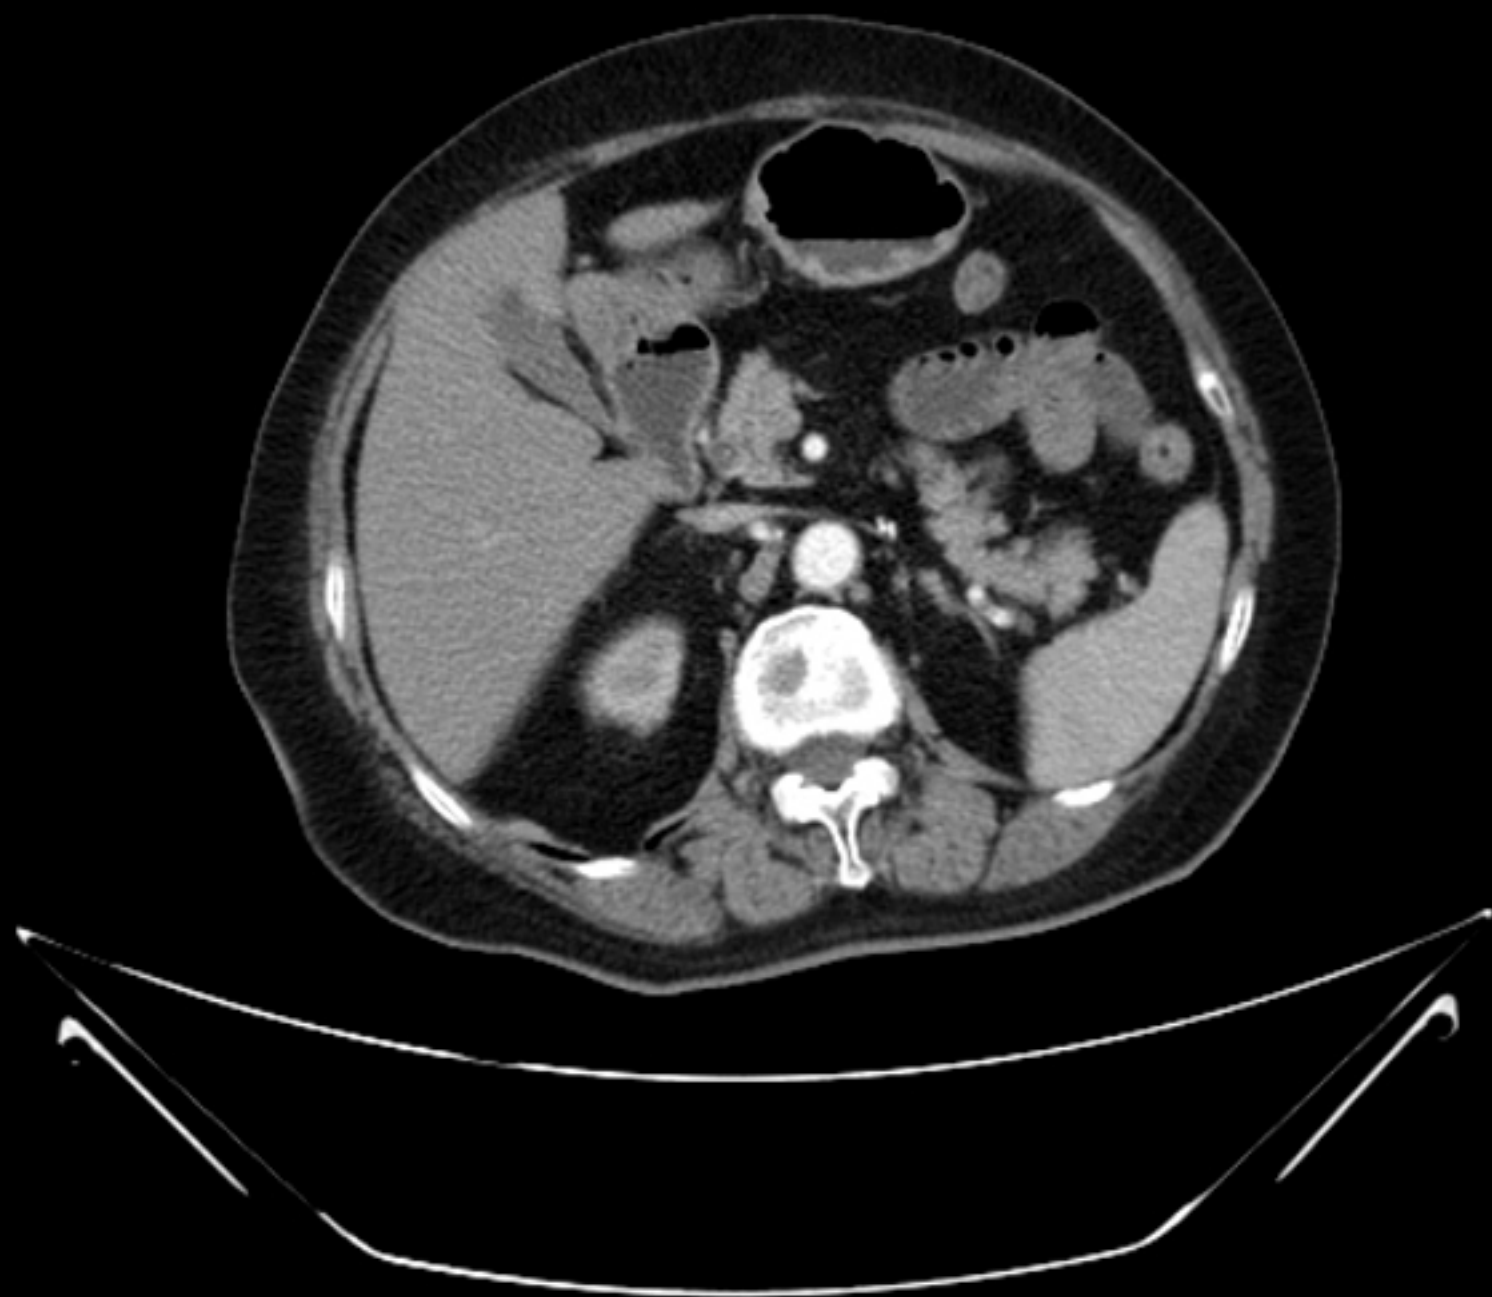

24cm

[P]

[R]

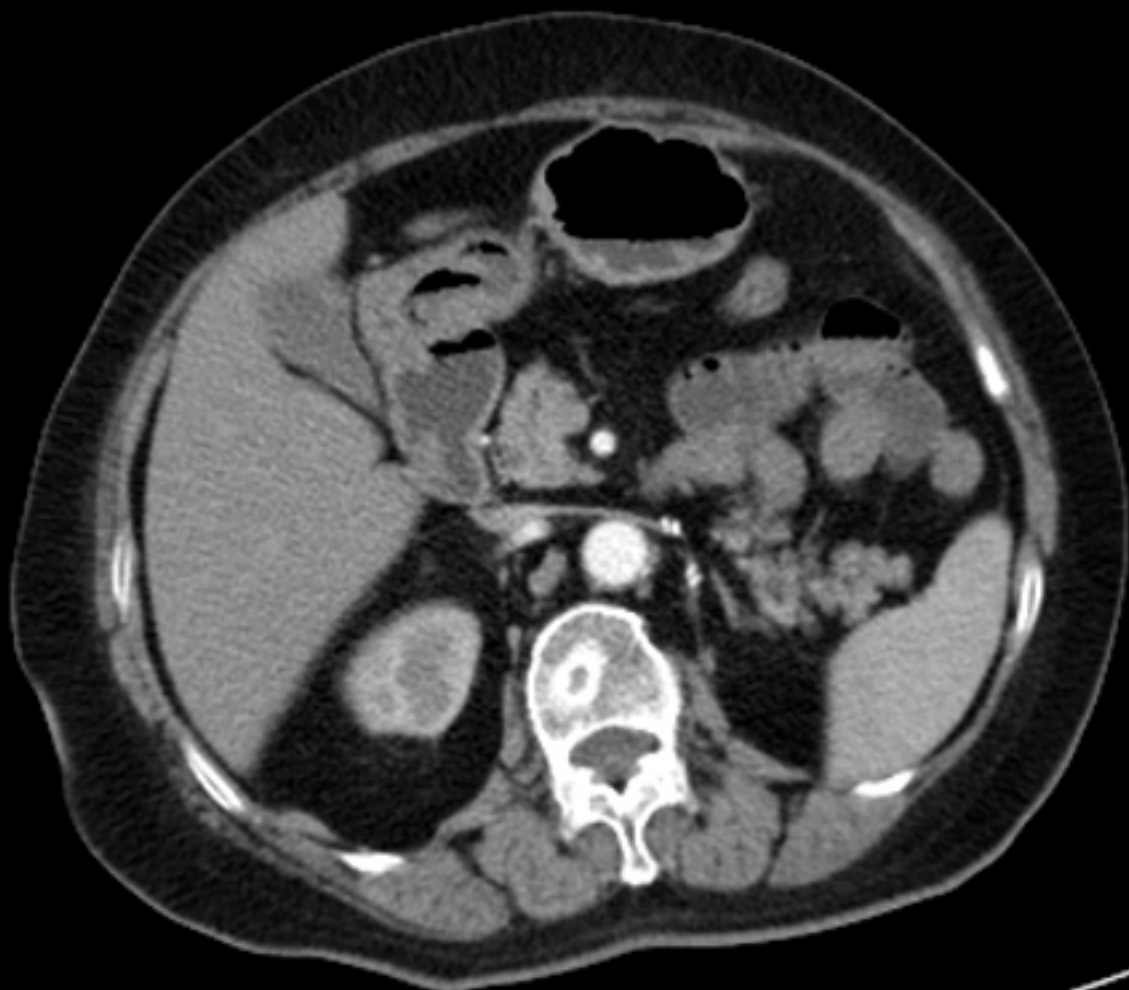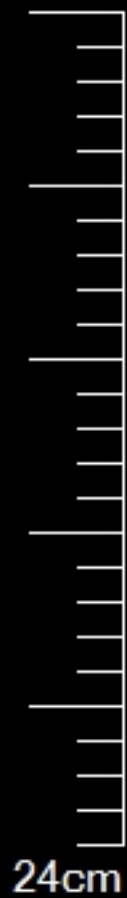

[P]

[R]

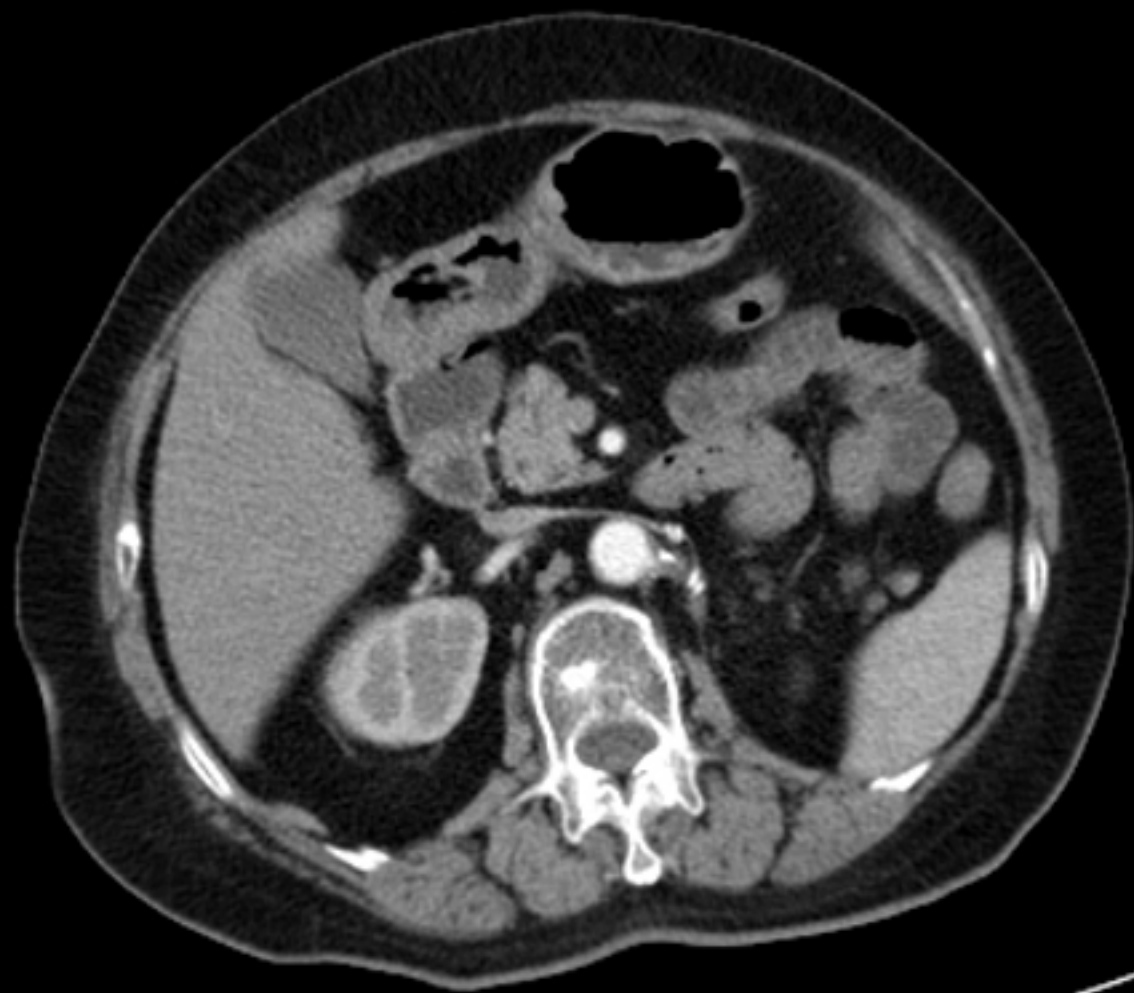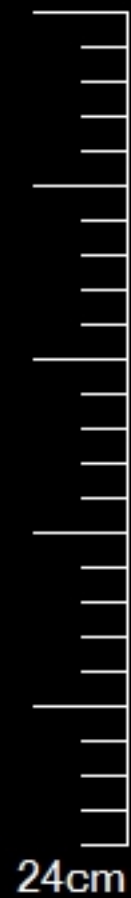

[P]



[R]

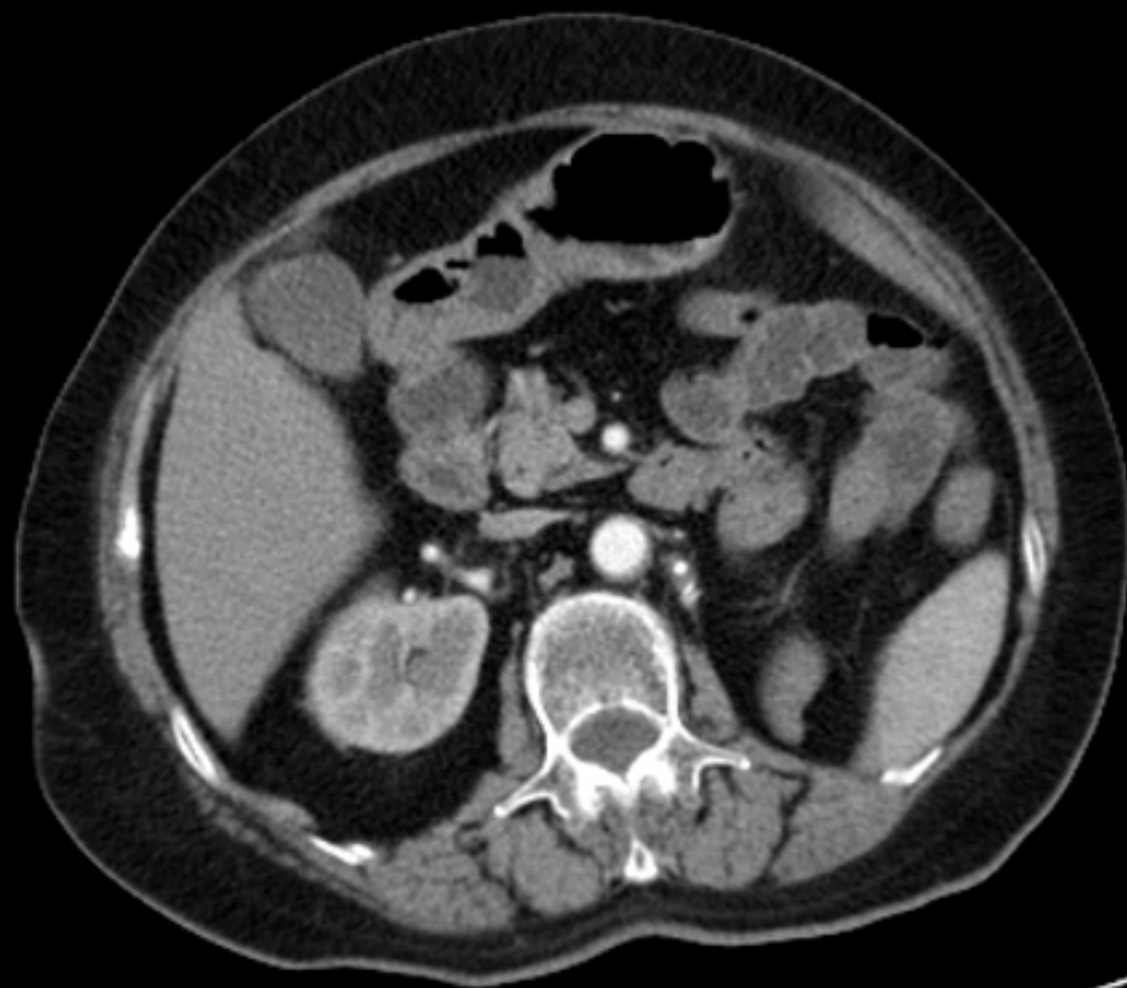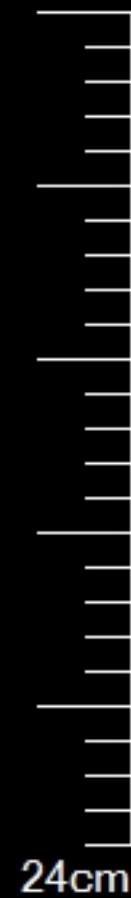

[P]

[R]

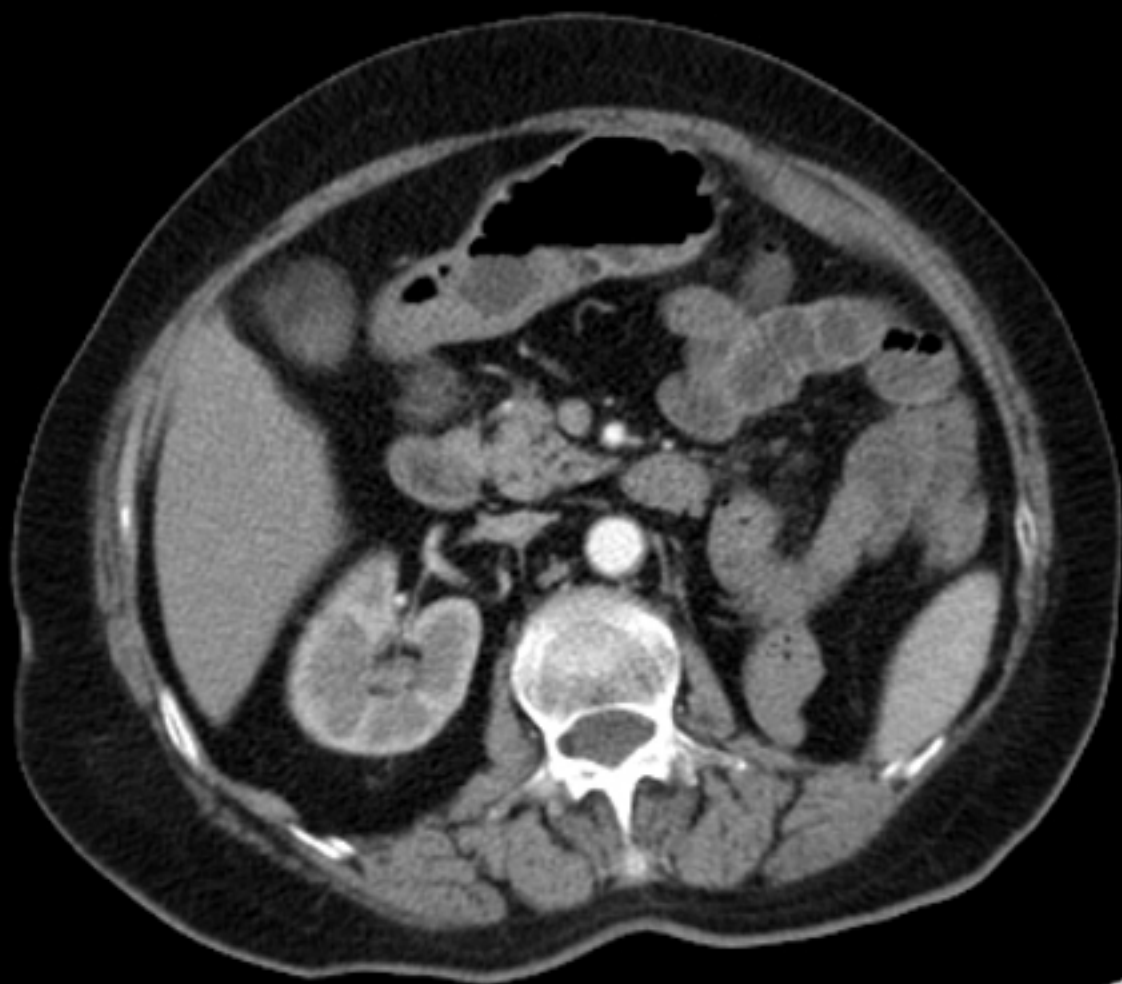

[P]



[R]

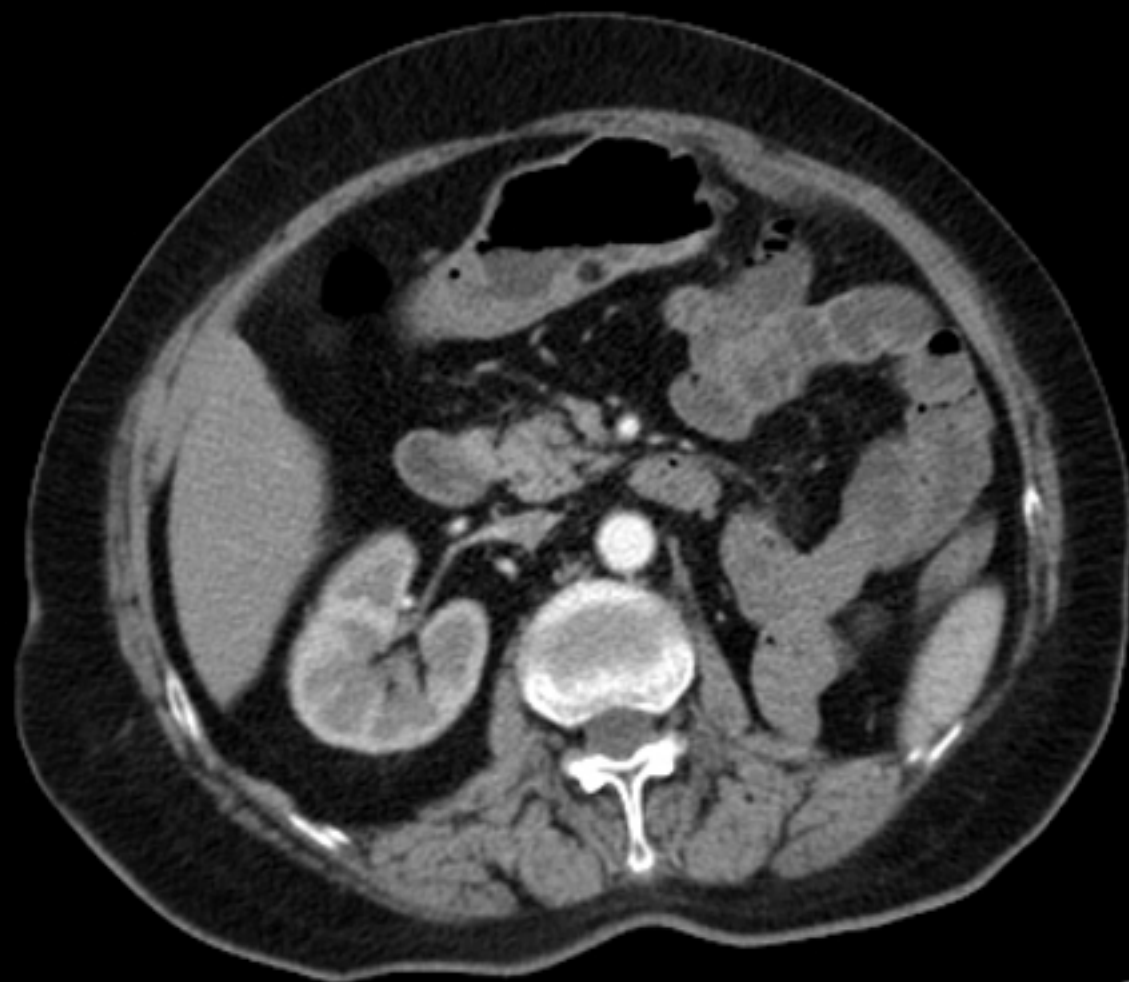

[P]

[R]

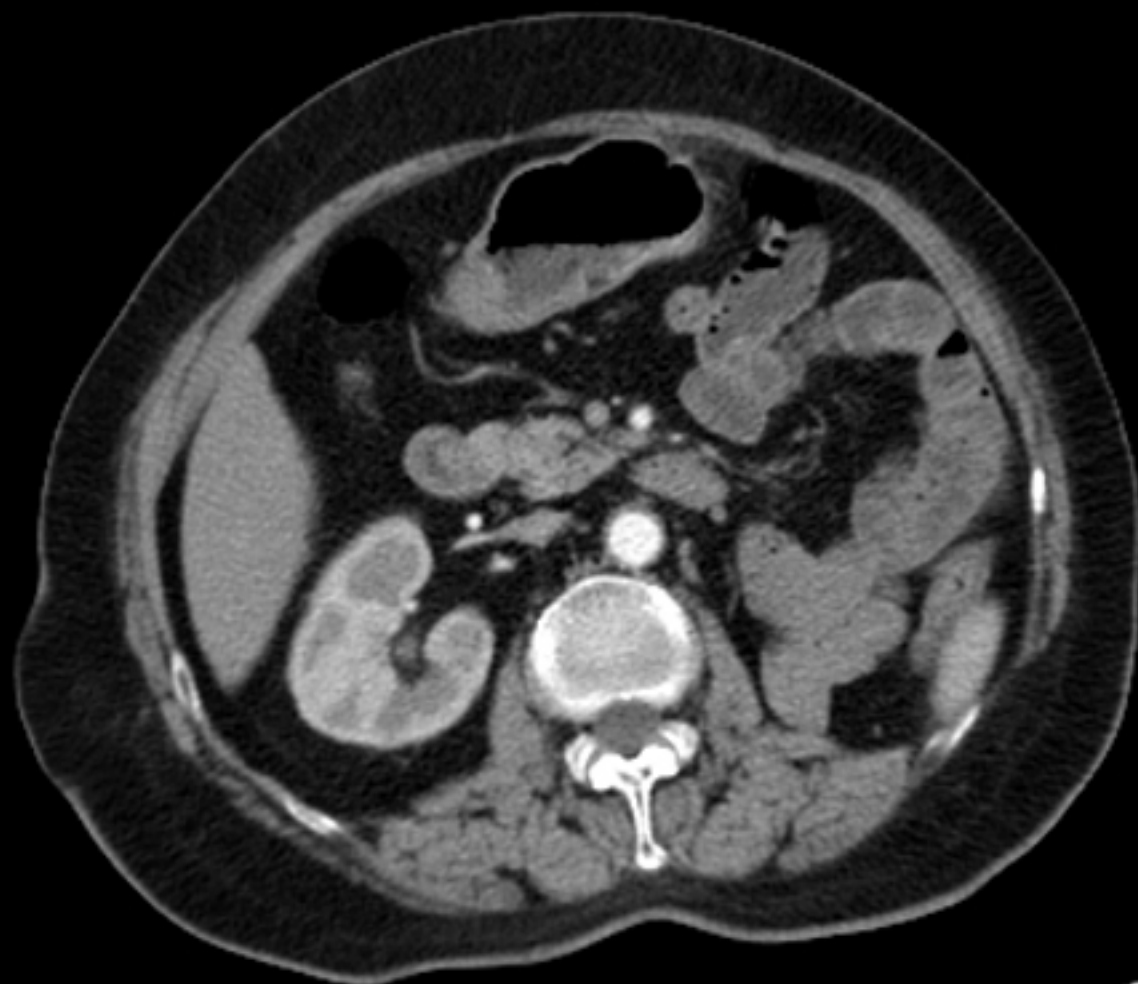

[P]

[R]

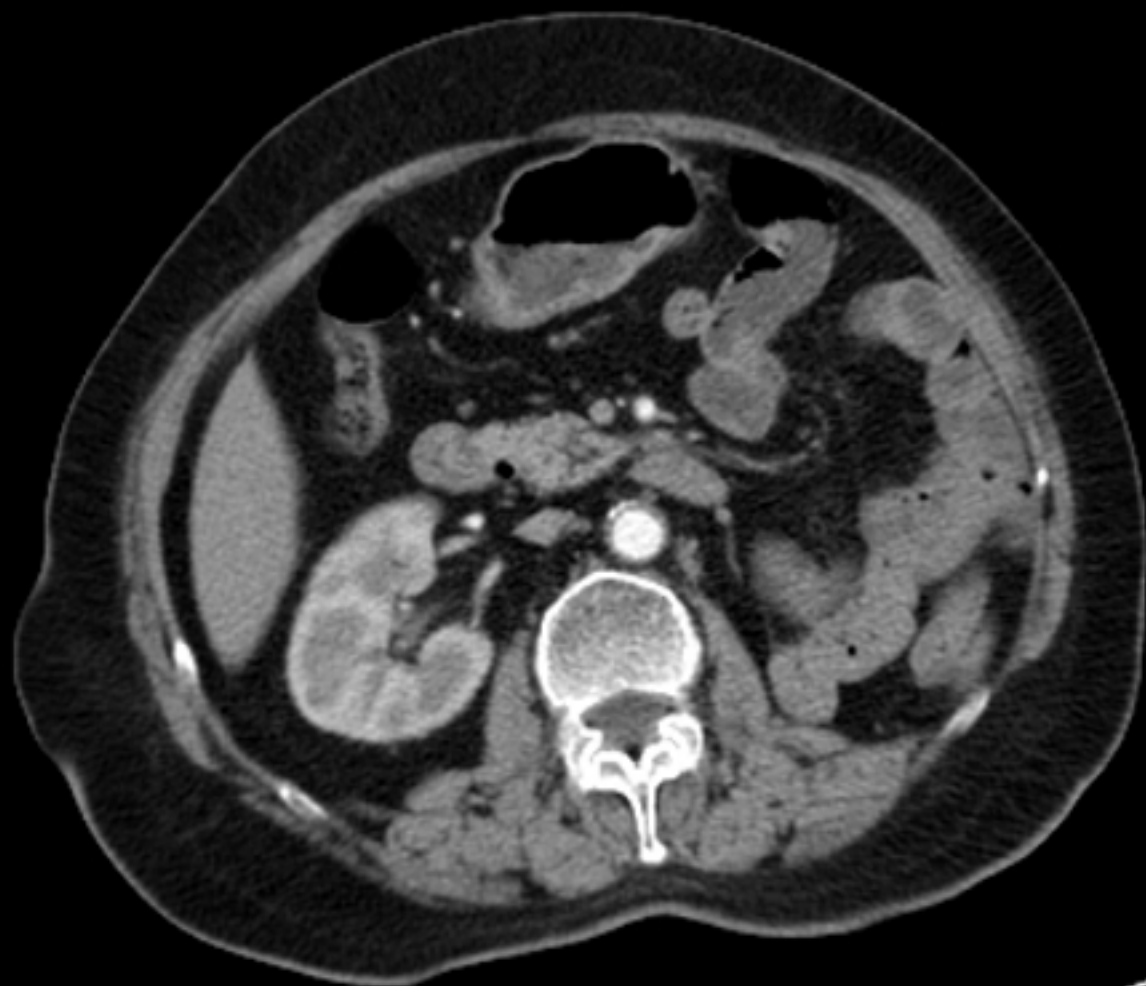

[P]

[R]

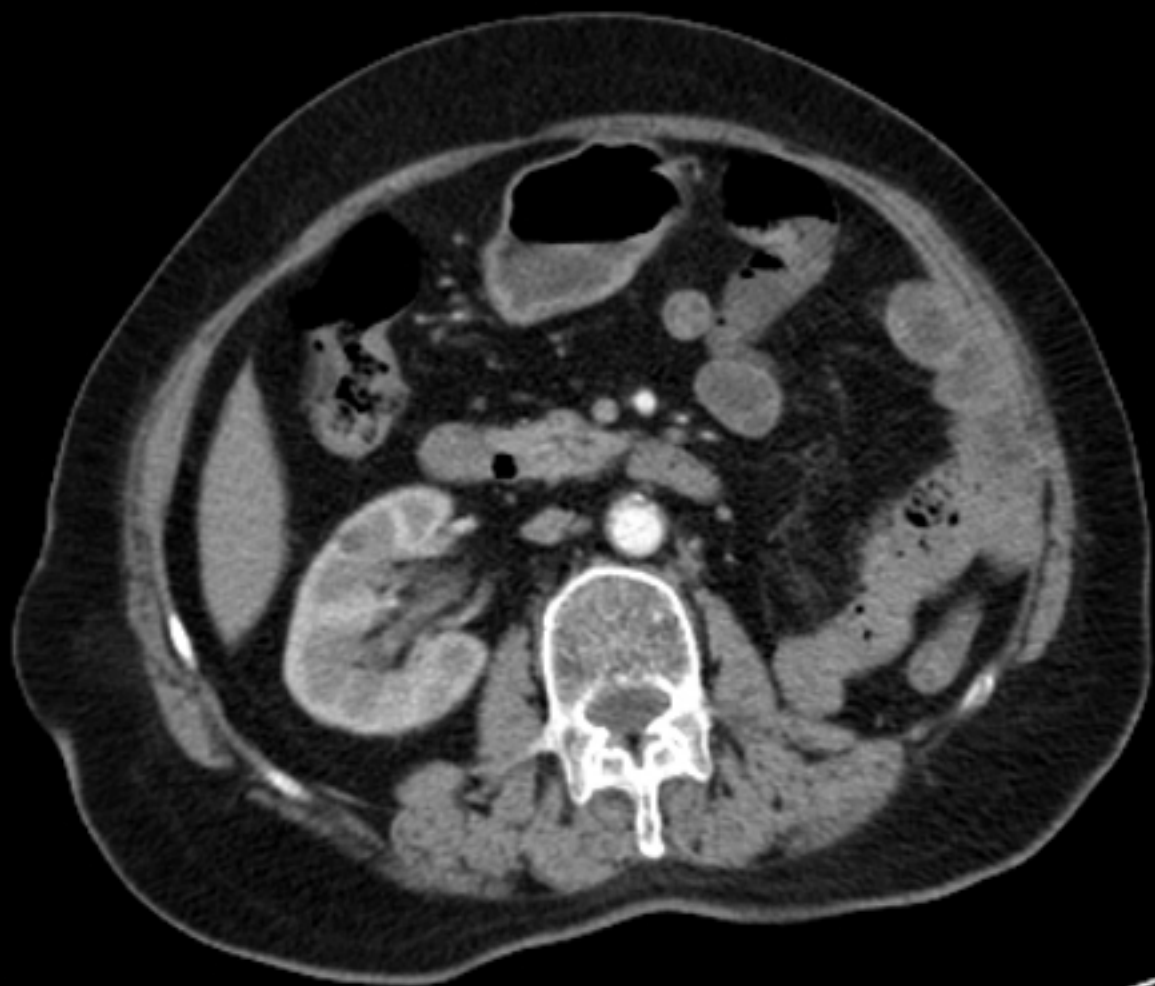

[P]

[R]

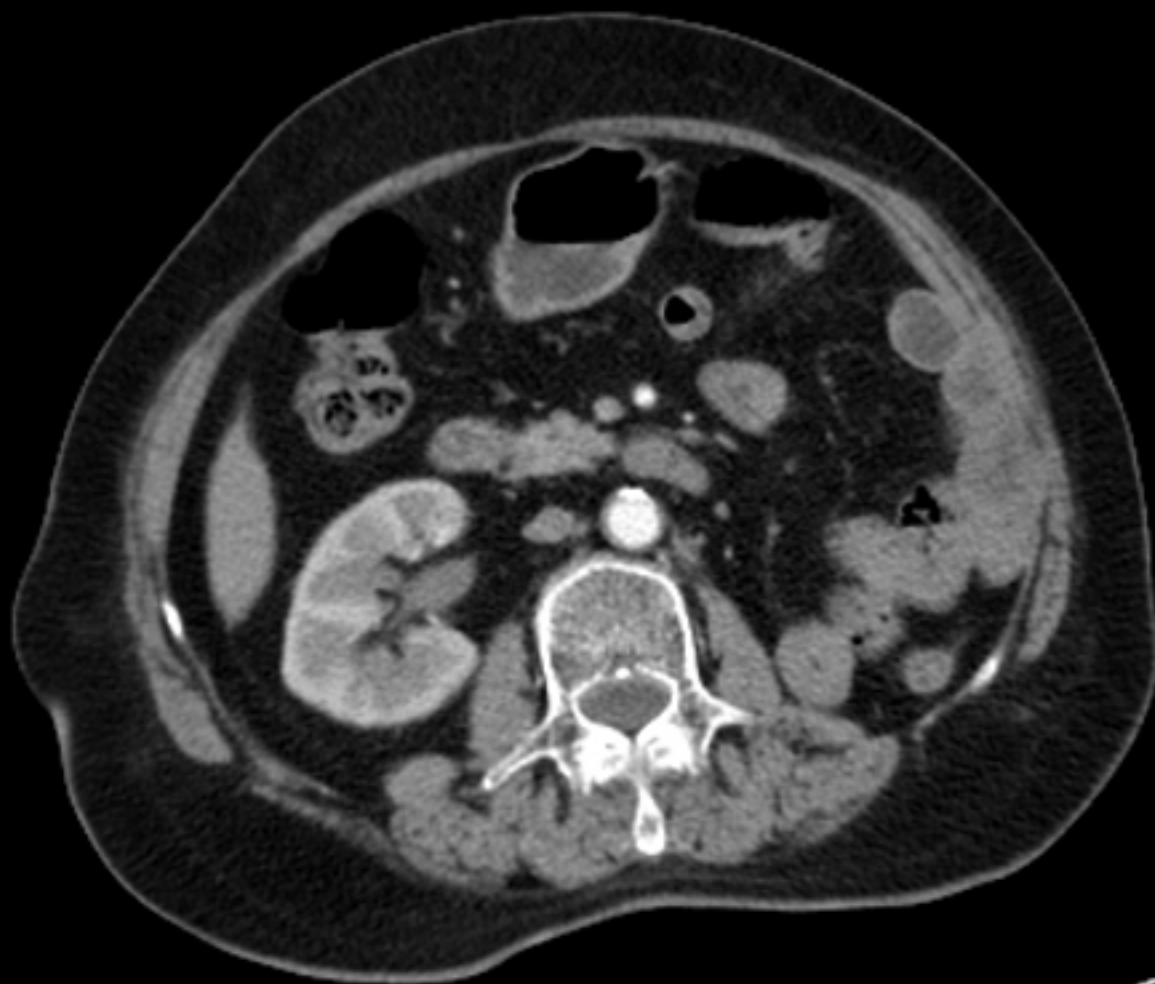

[P]

[R]

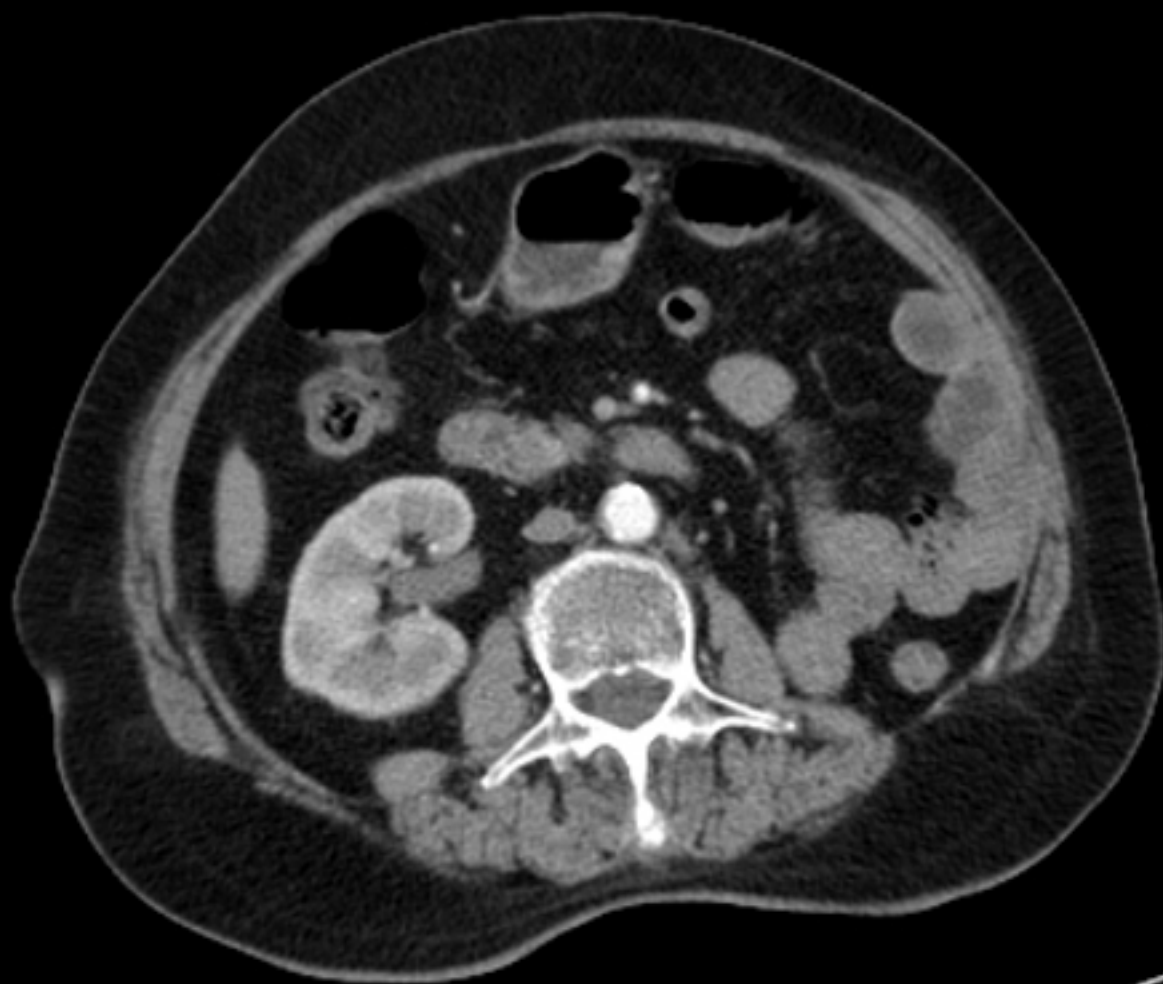

[P]



[R]

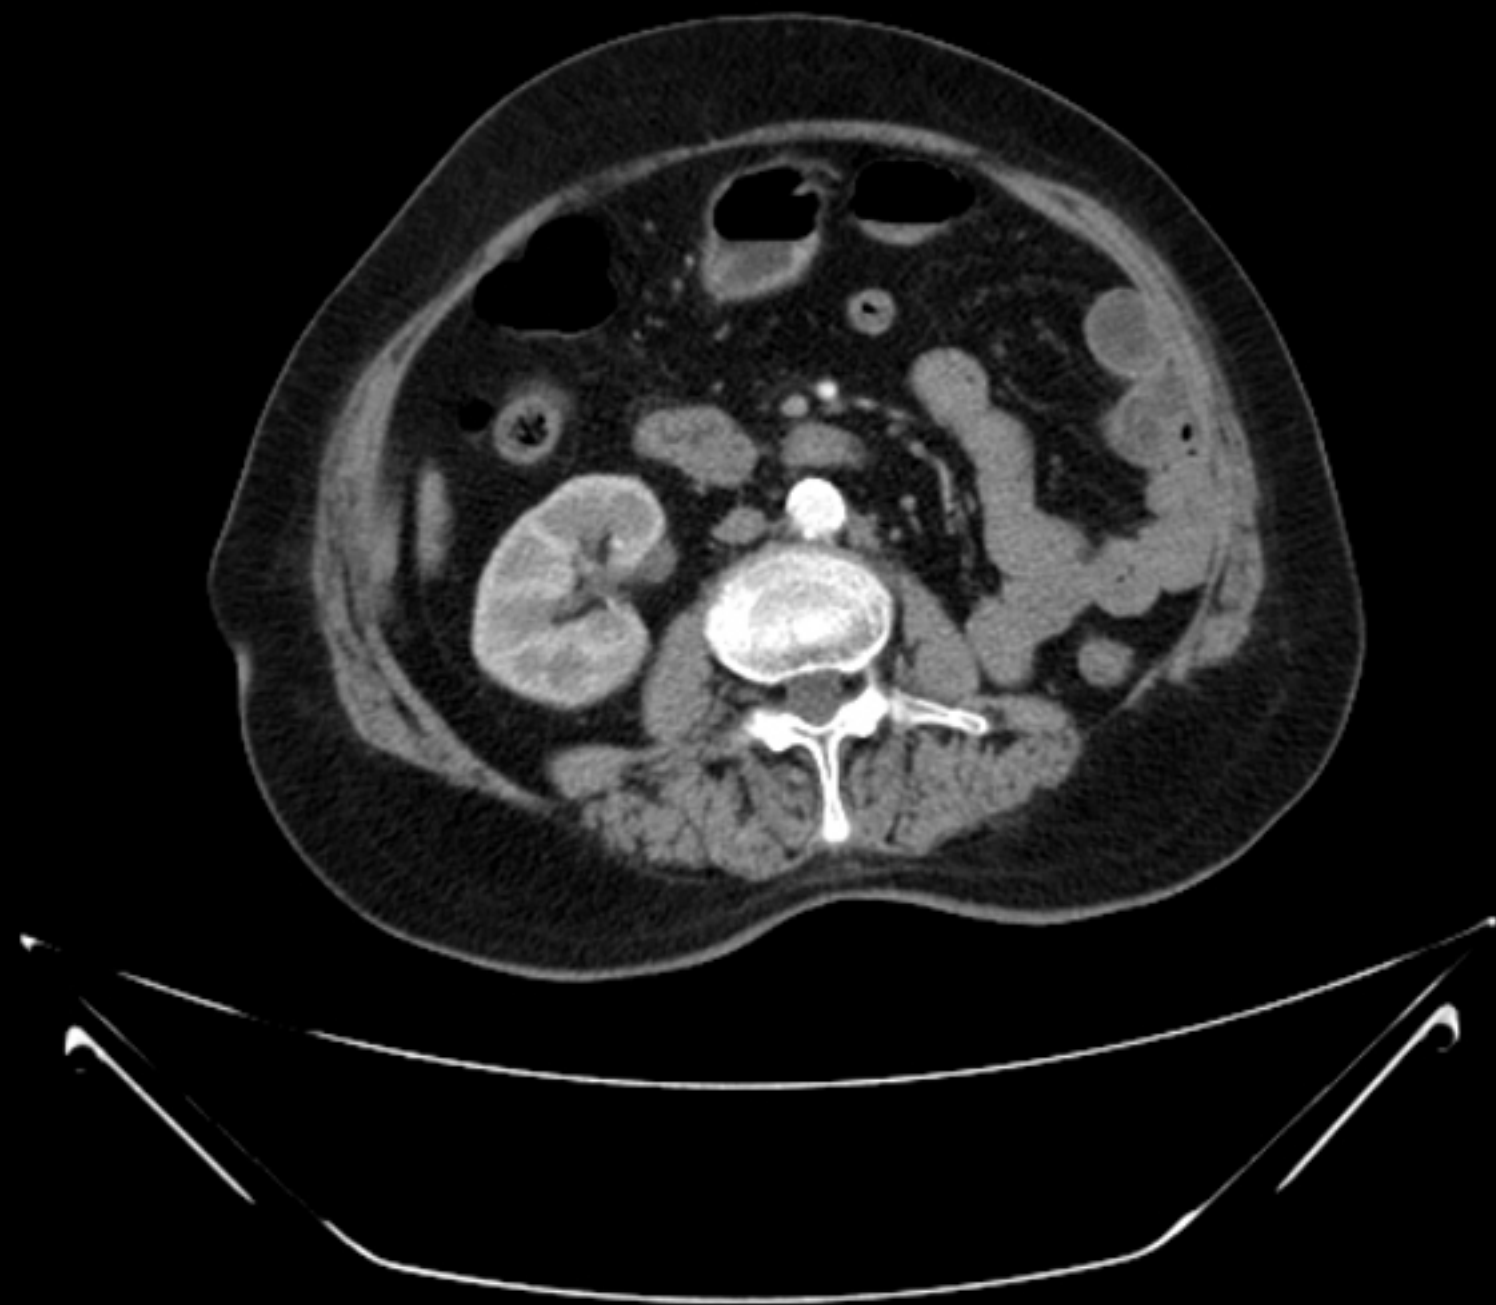

[P]

[R]

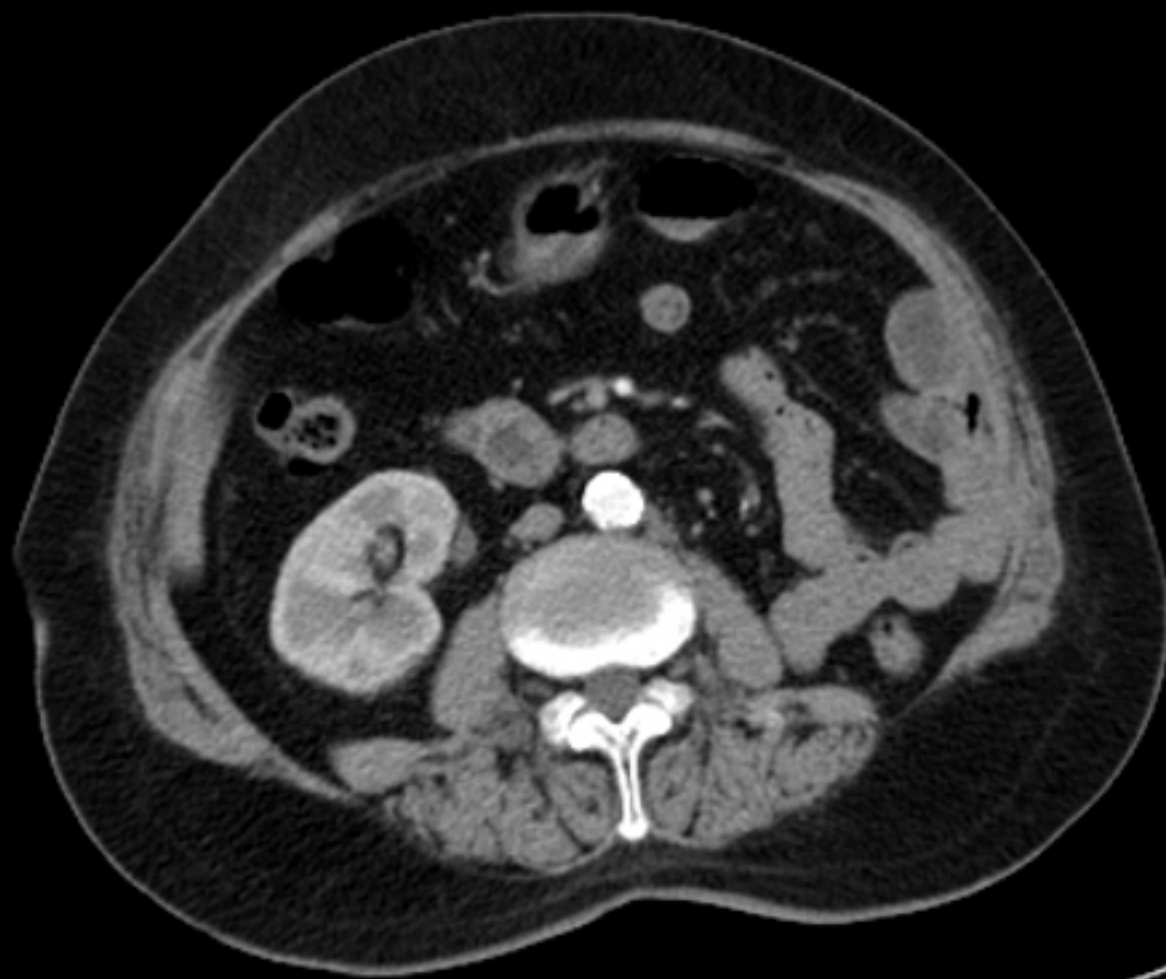

[P]

[R]

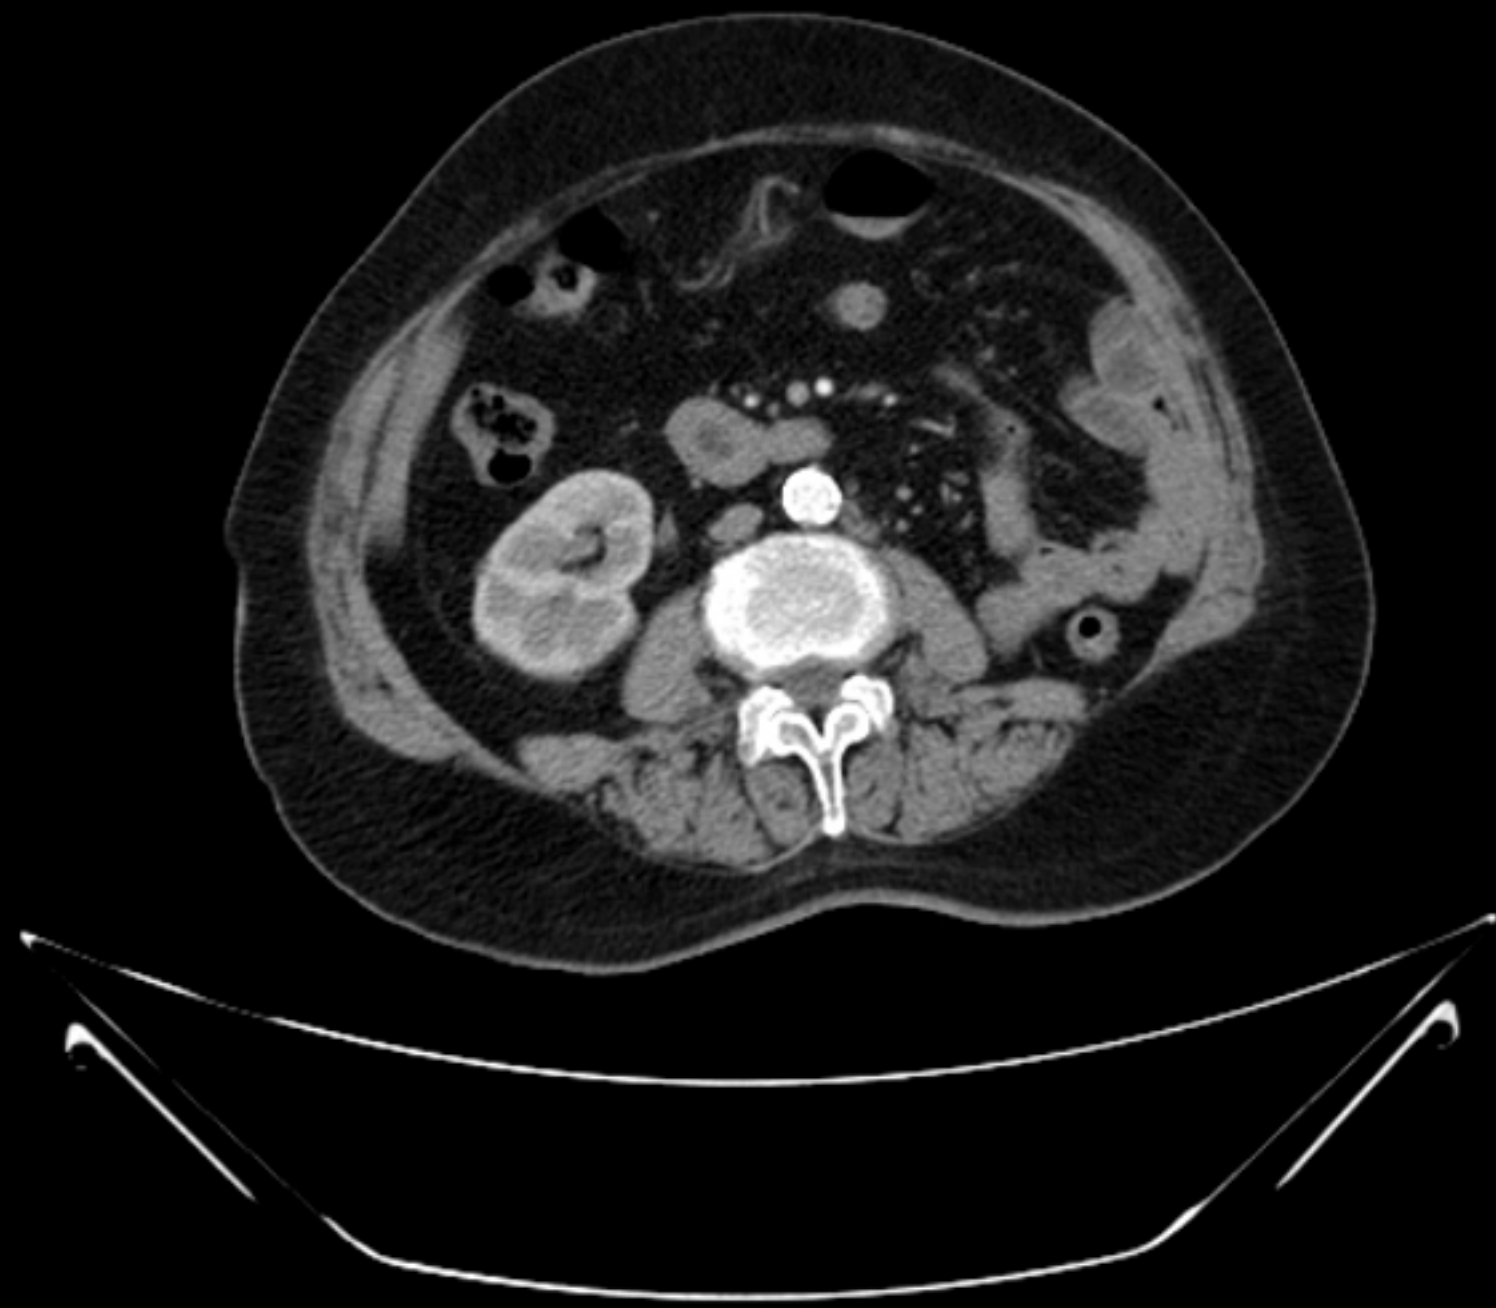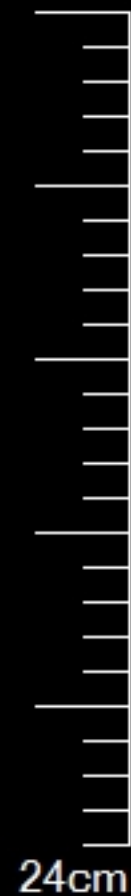

[P]

[R]

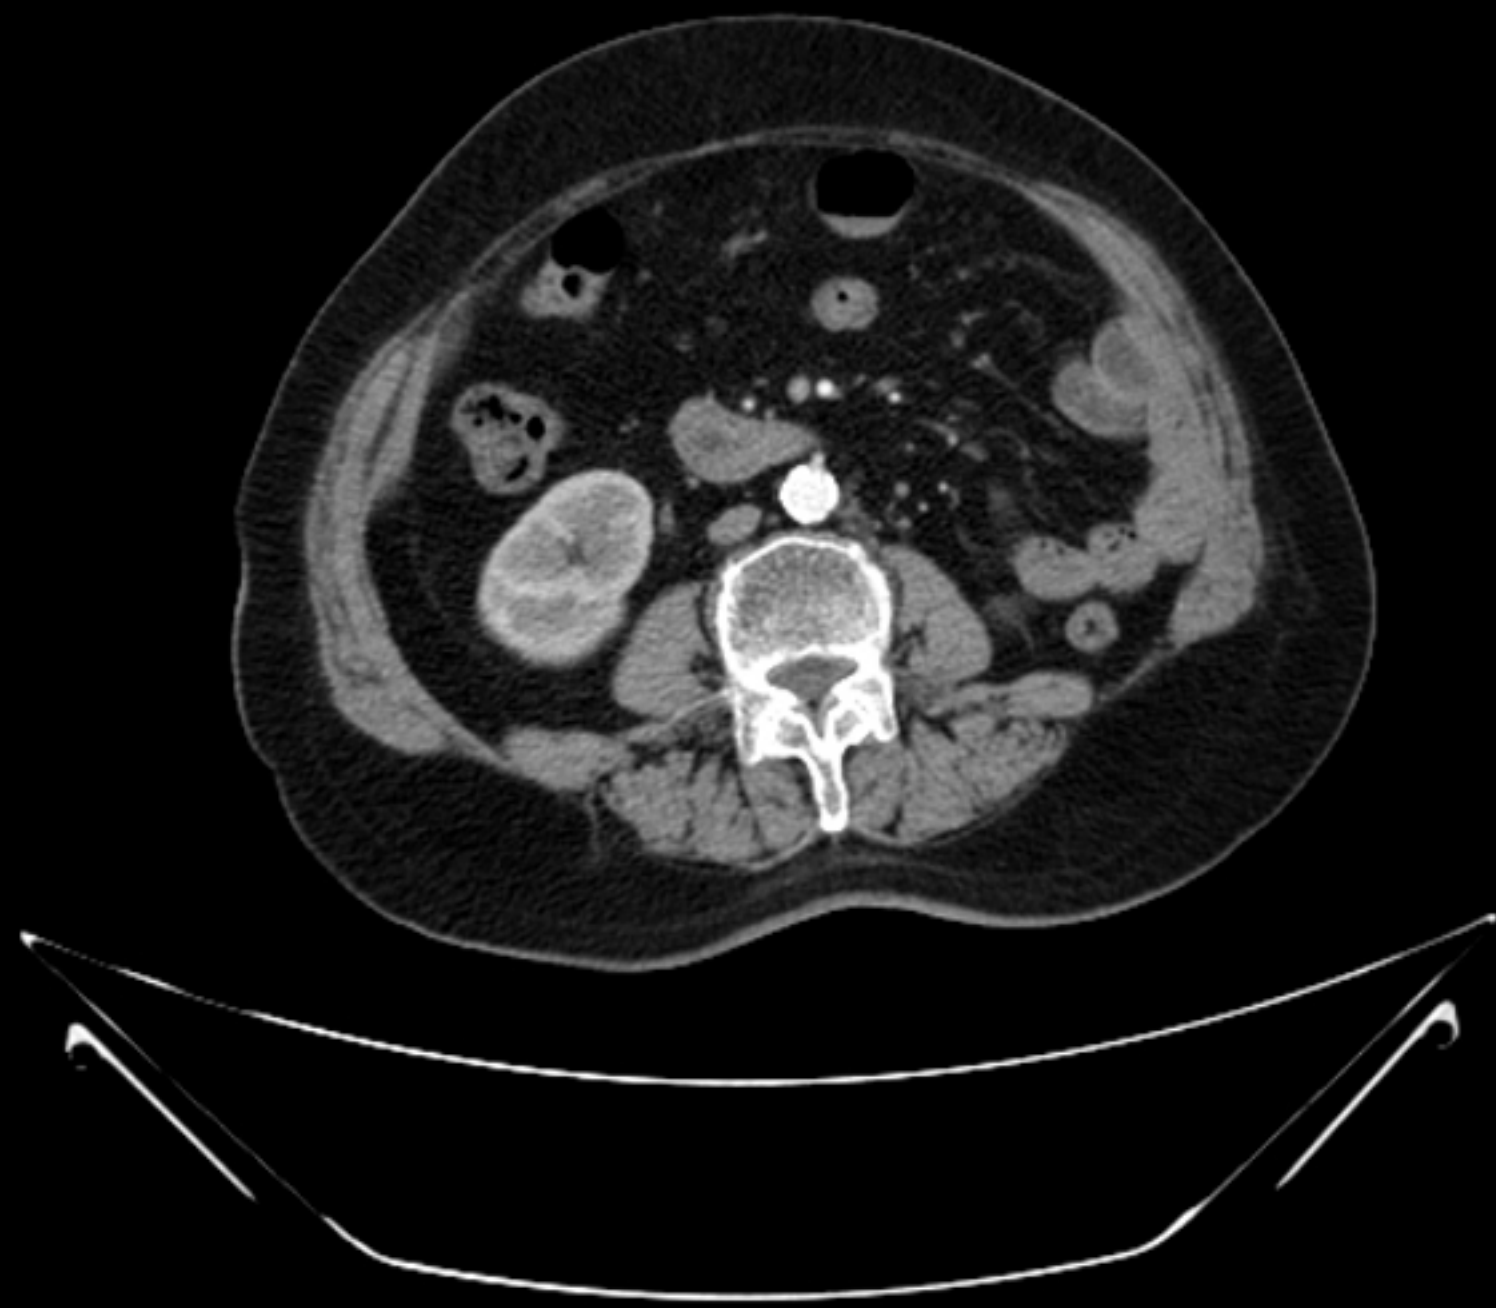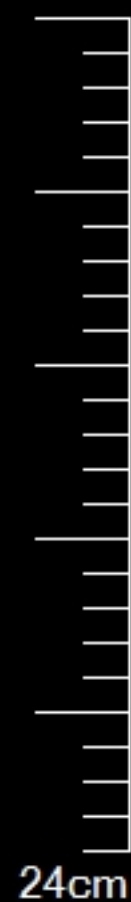

[P]

[R]

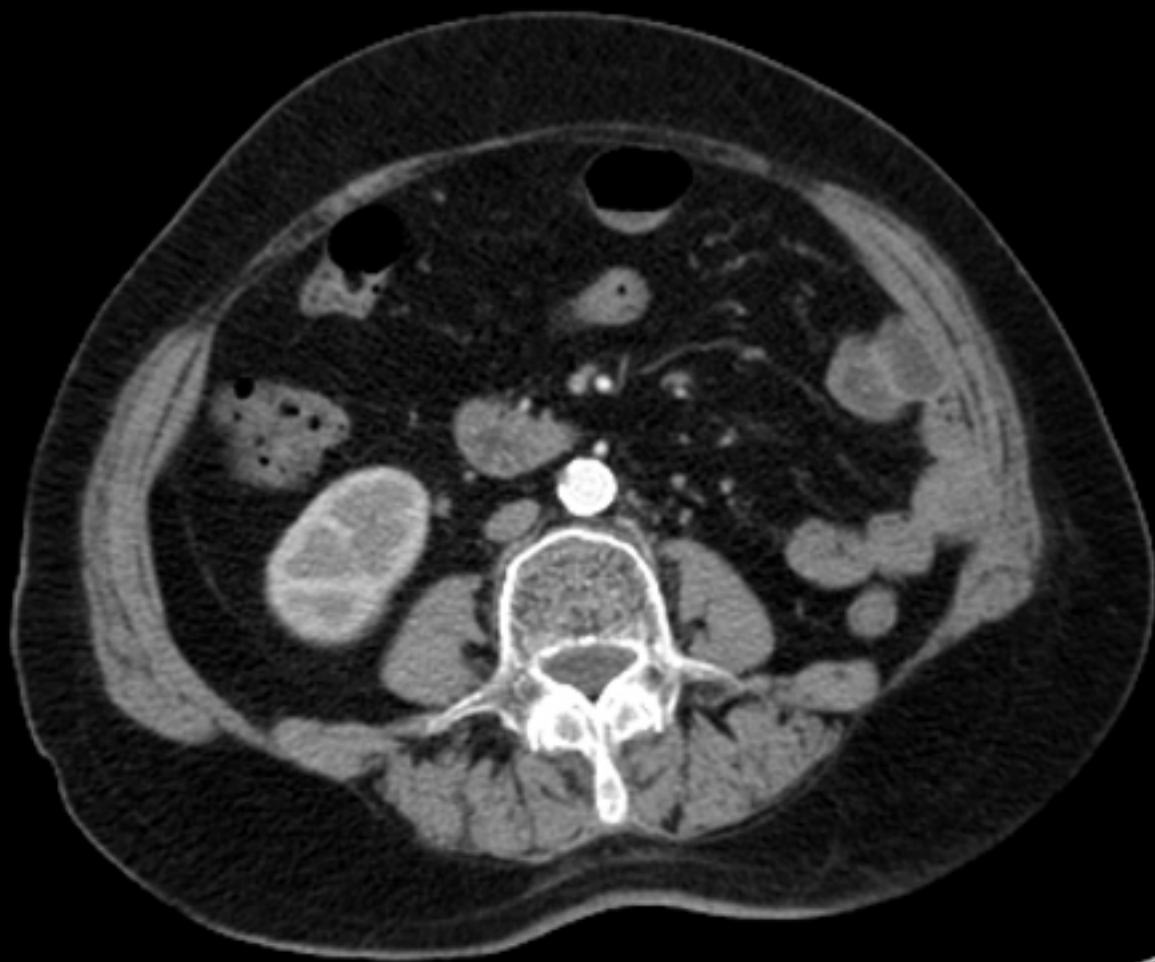

[P]

[R]

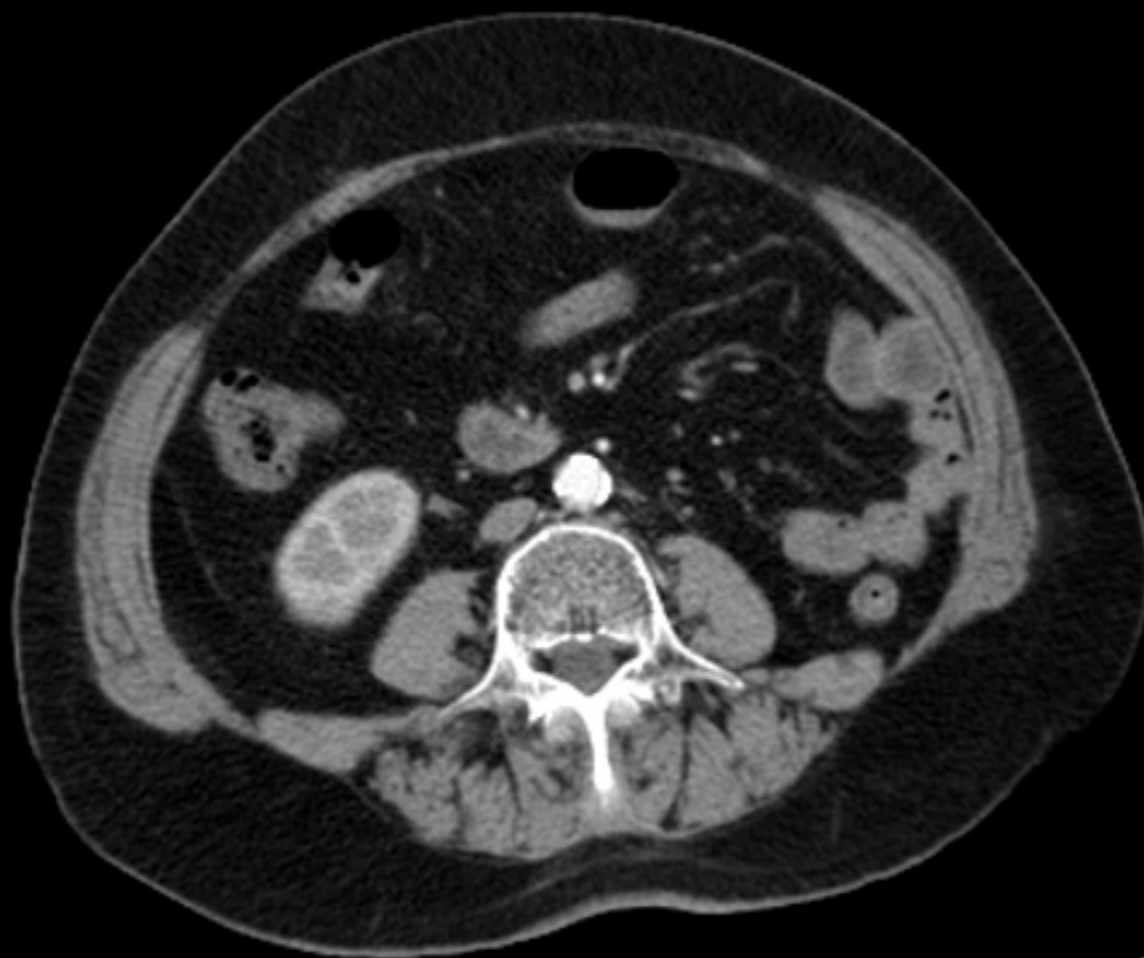

[P]



[R]

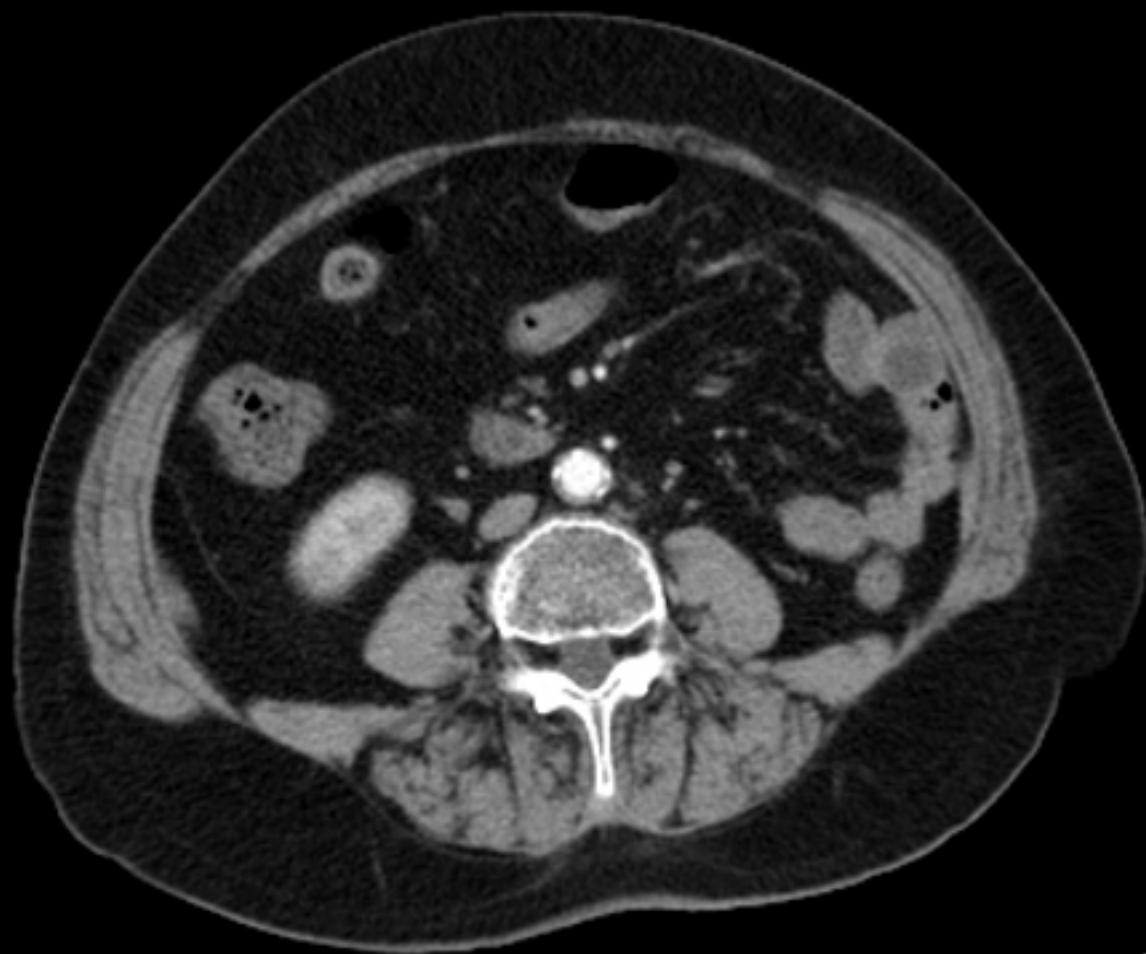

[P]

[R]

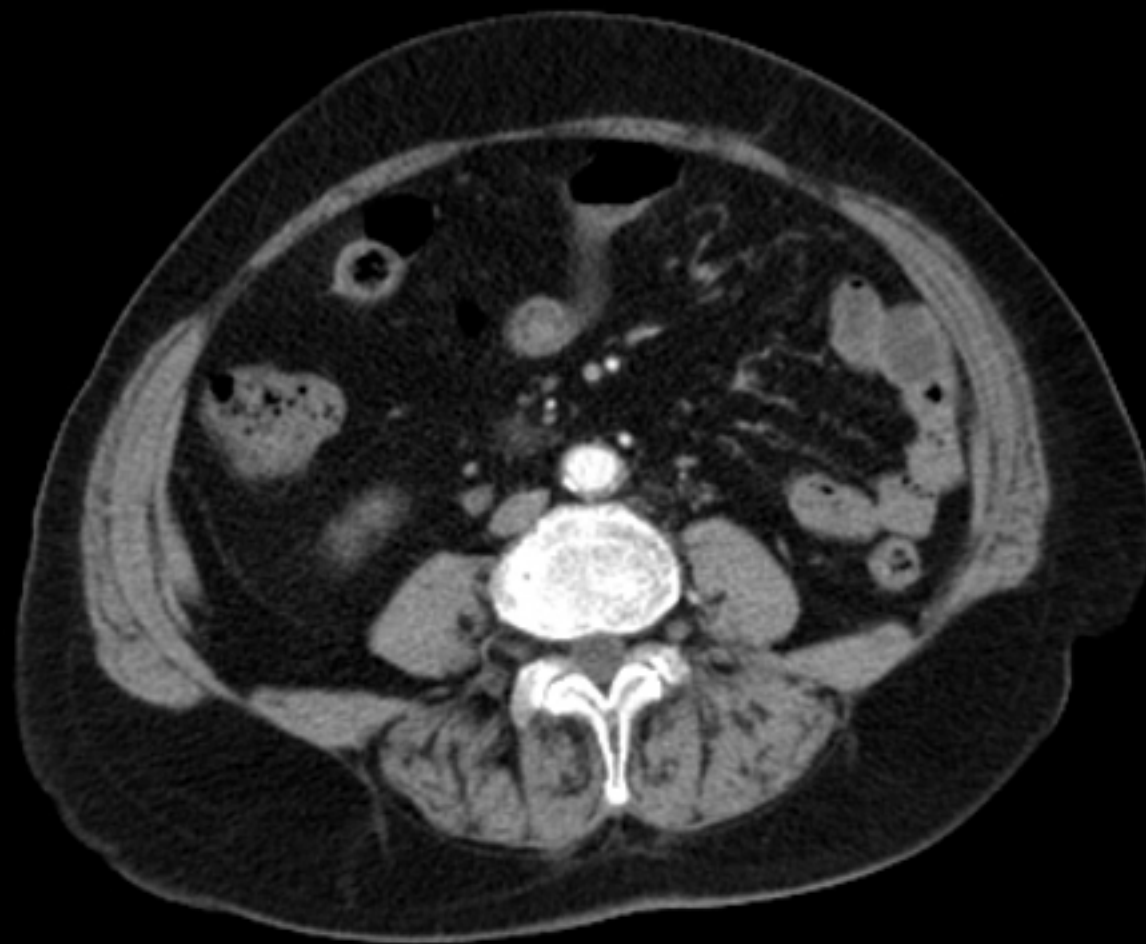

[P]

[R]

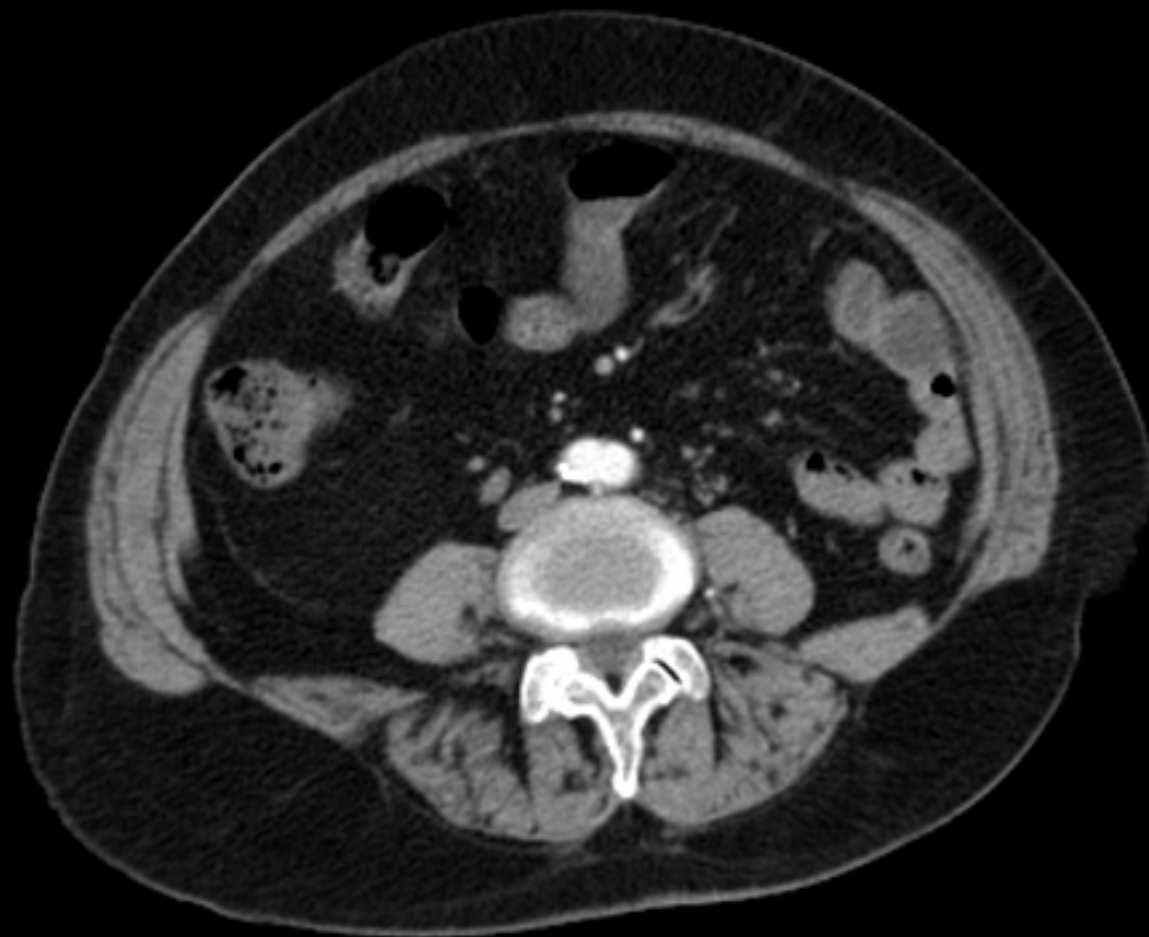

[P]

[R]

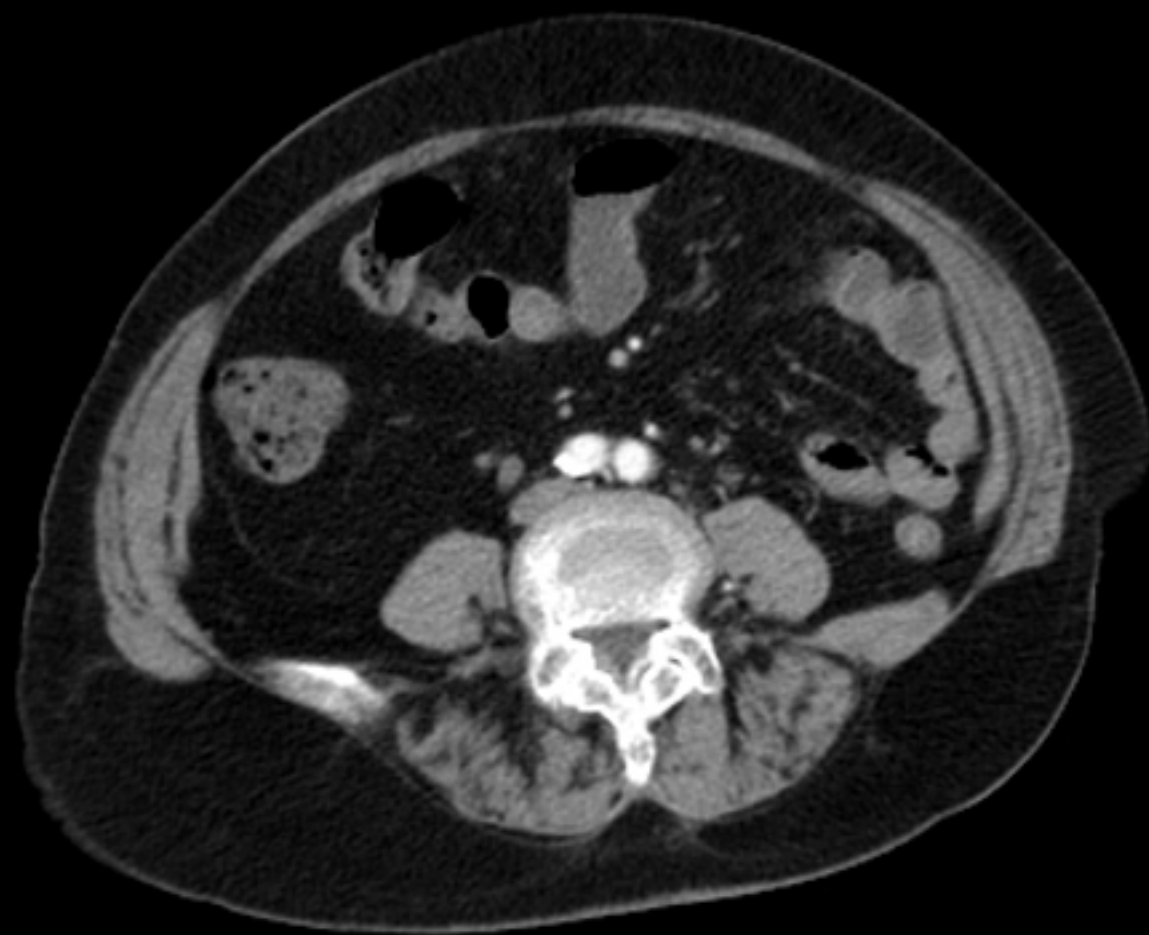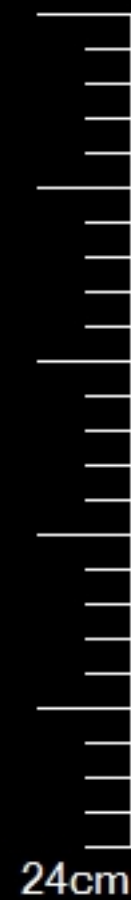

[P]

[R]

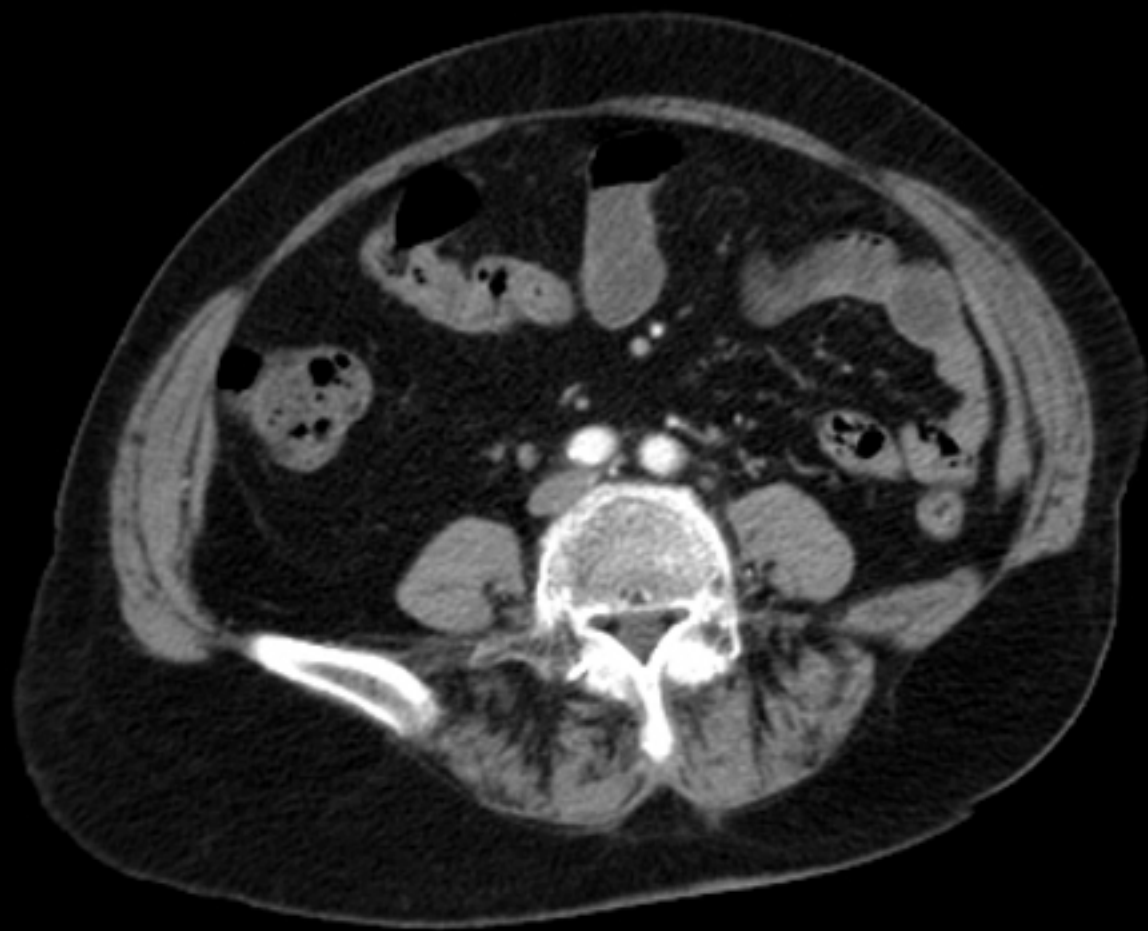

[P]

[R]

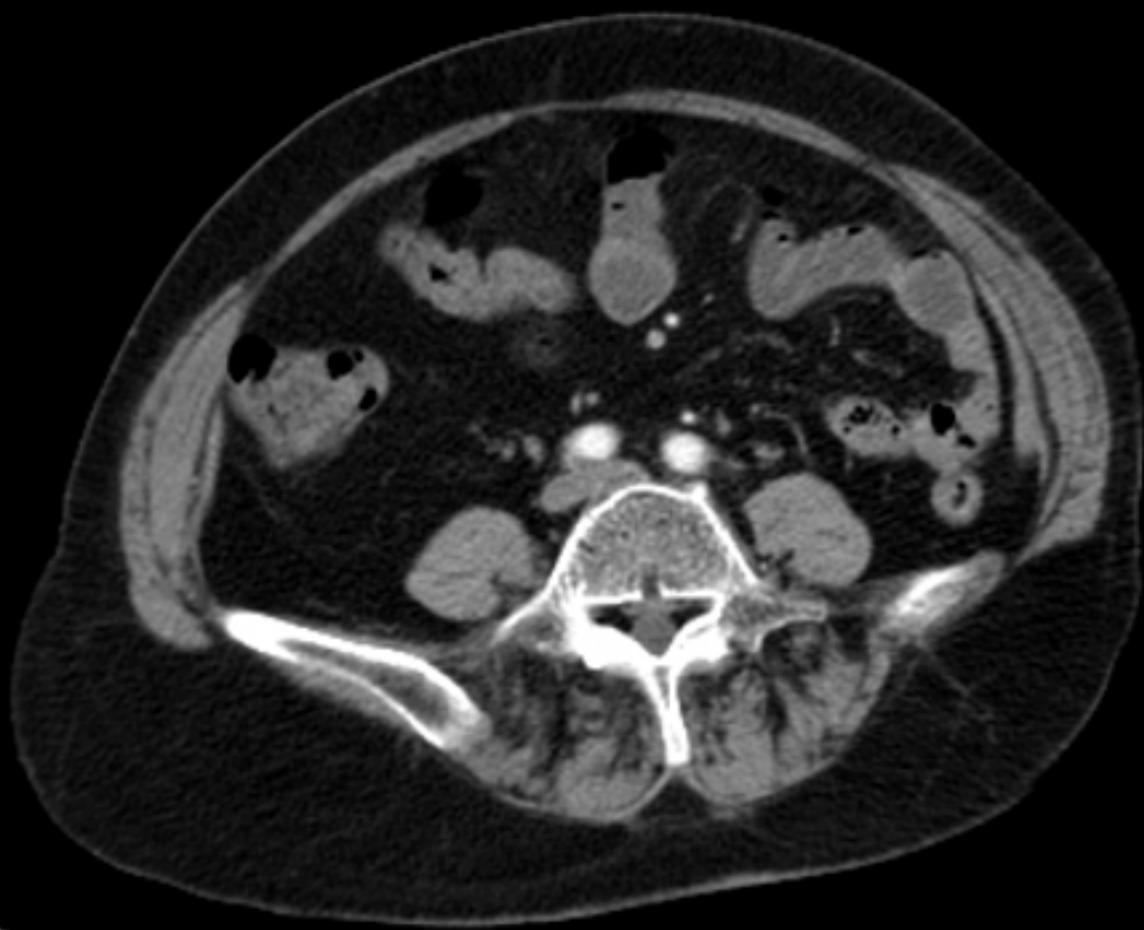

[P]



[R]

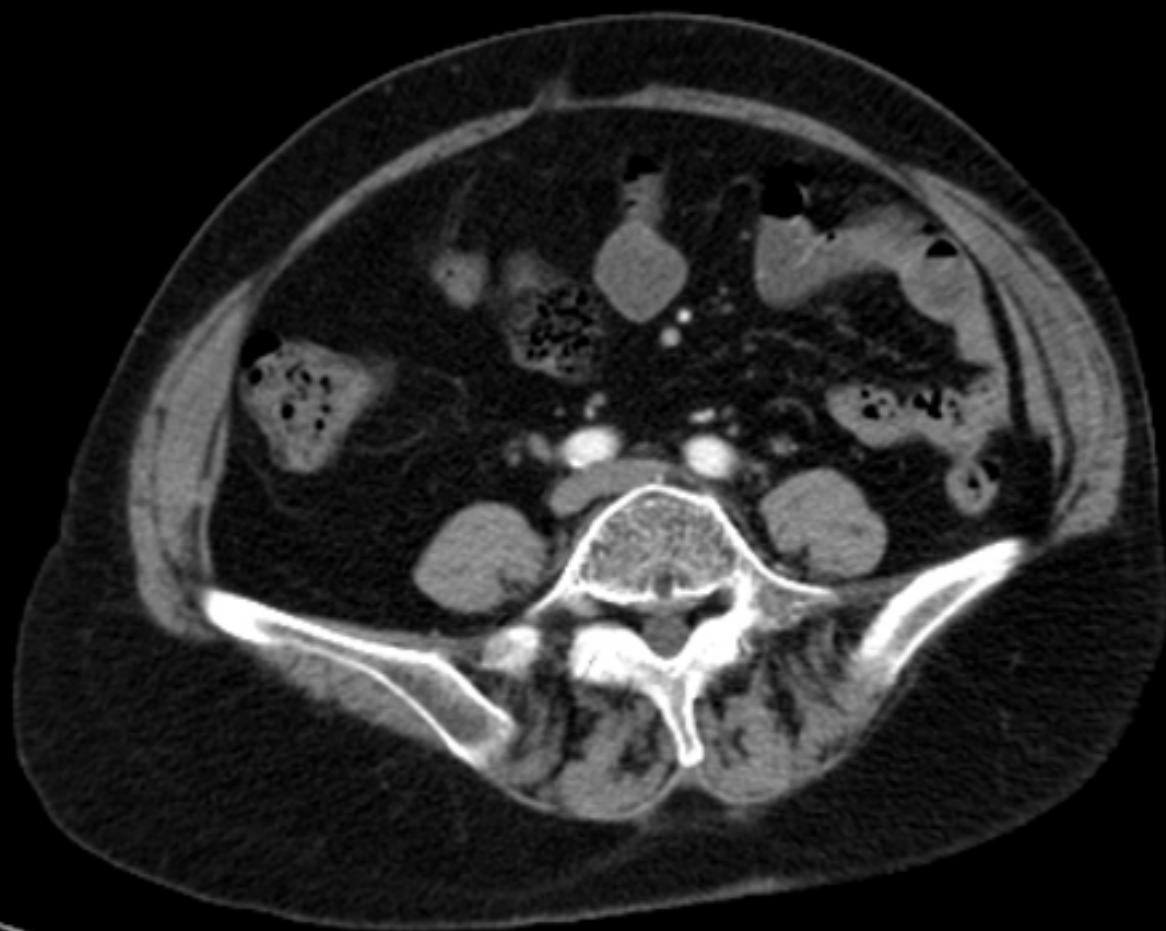

[P]

[R]

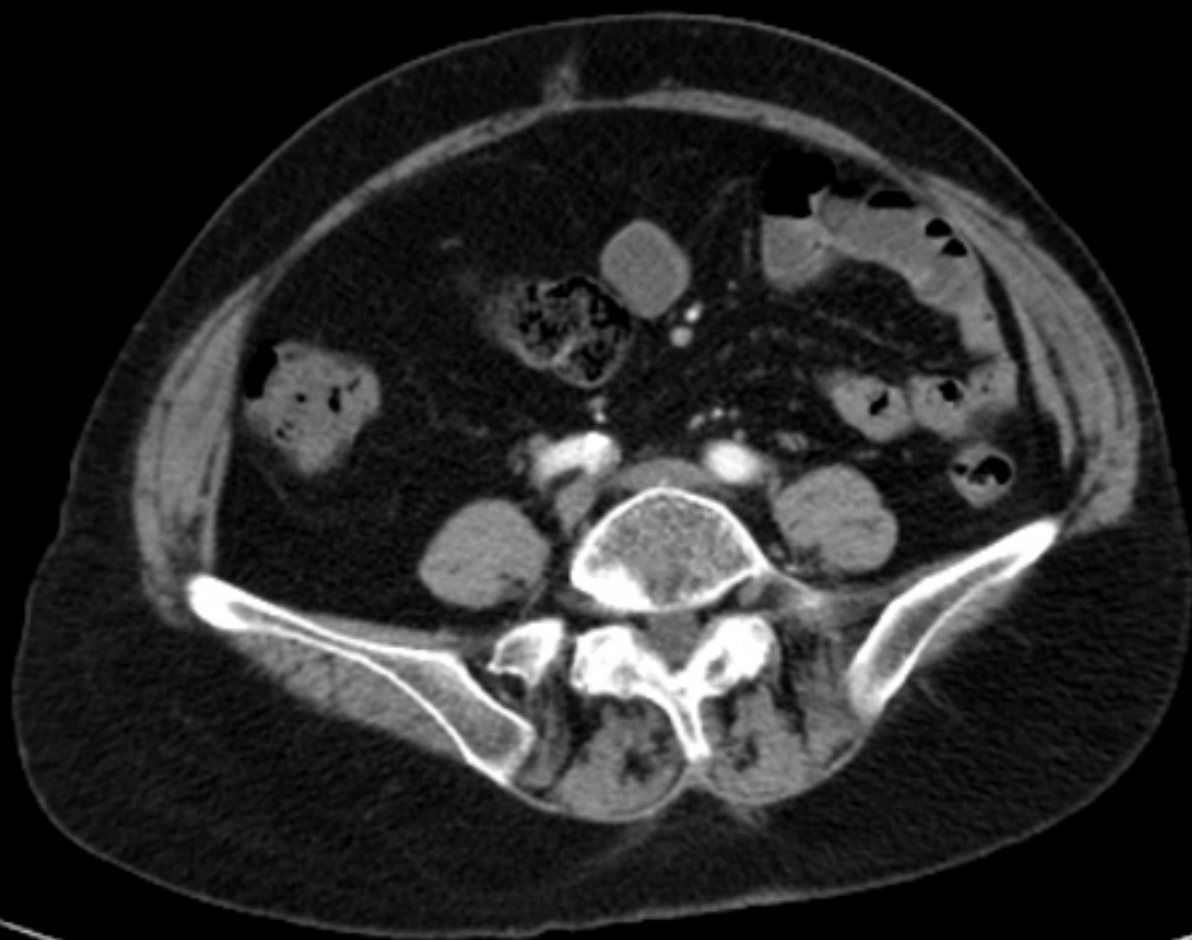

[P]

[R]

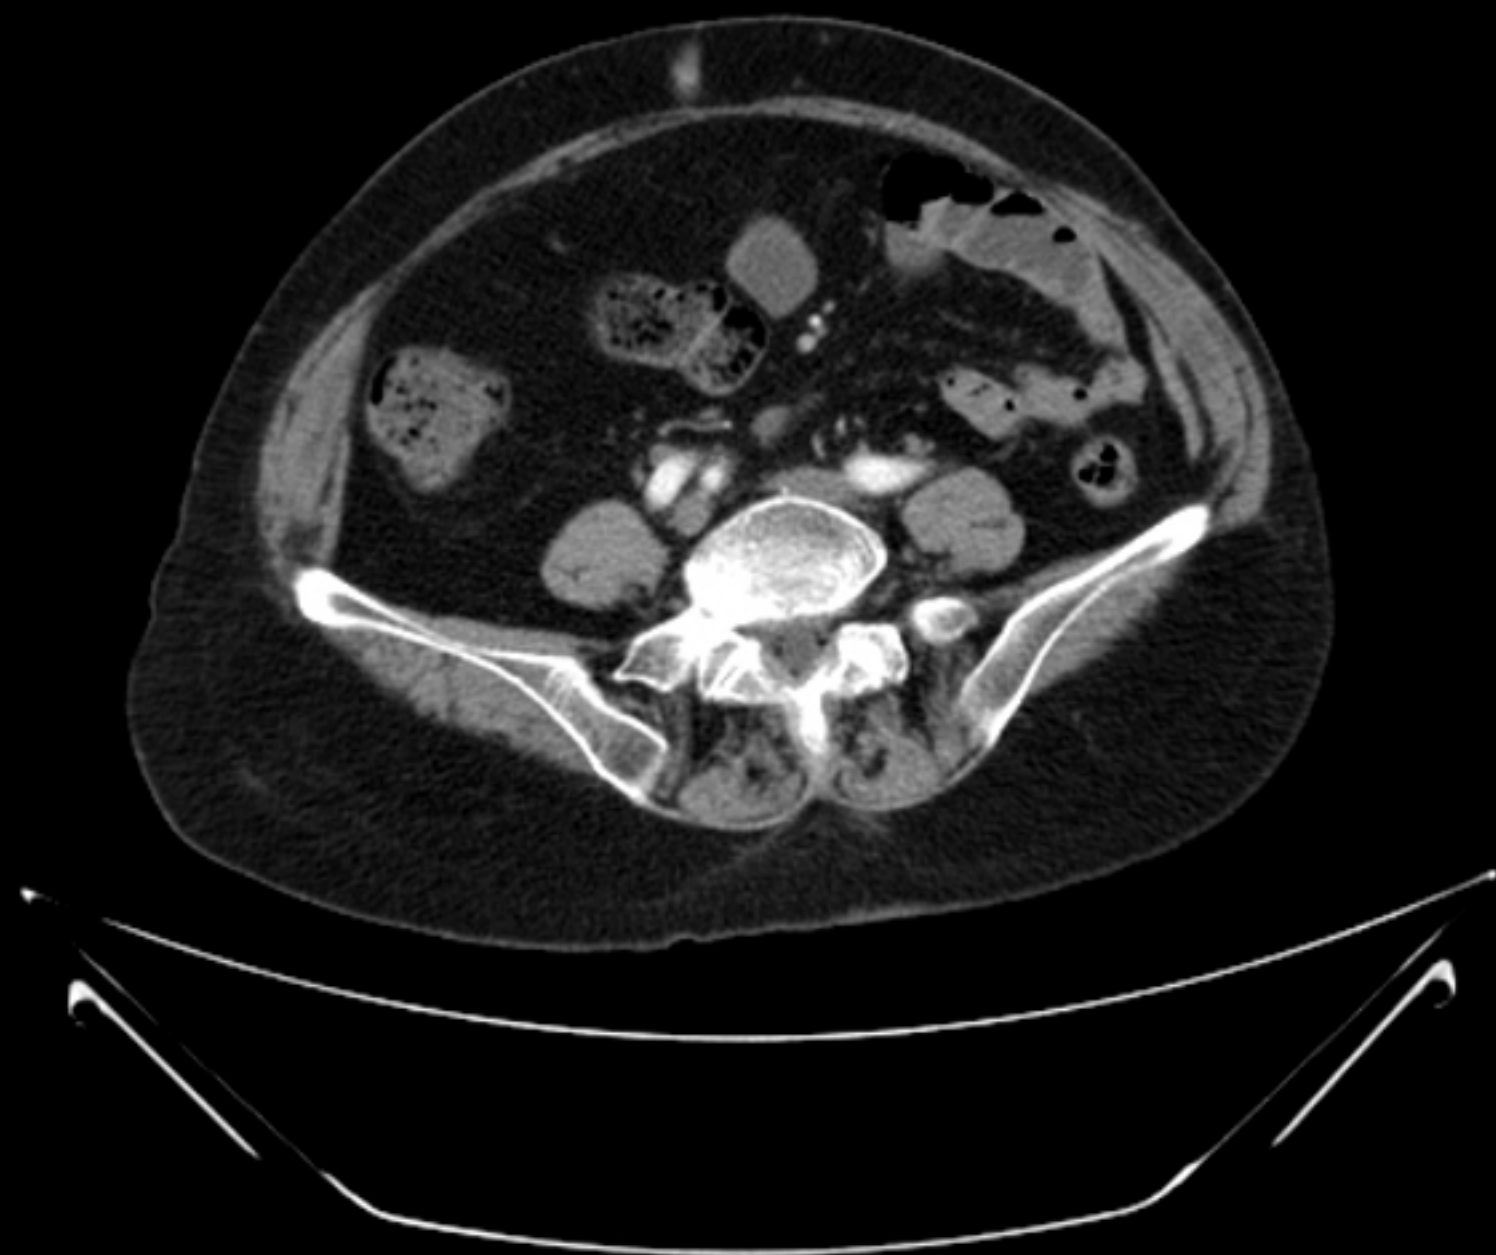

[P]

[R]

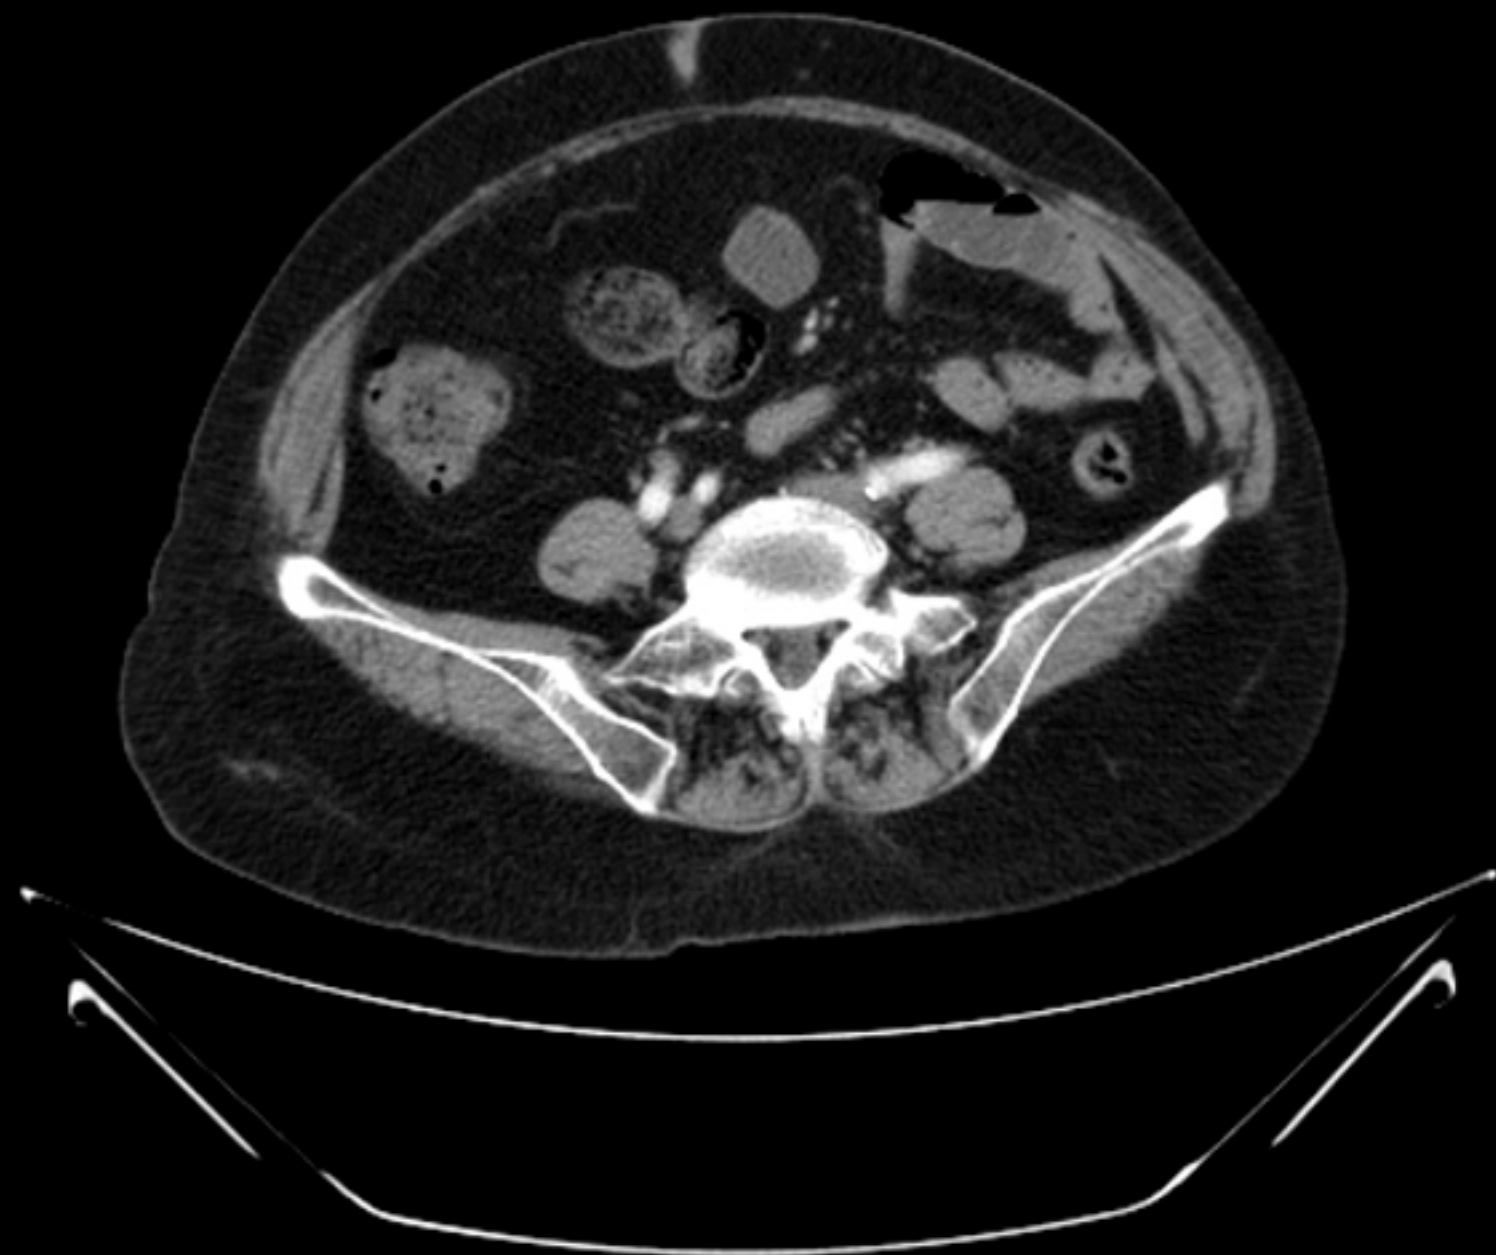

[P]

[R]

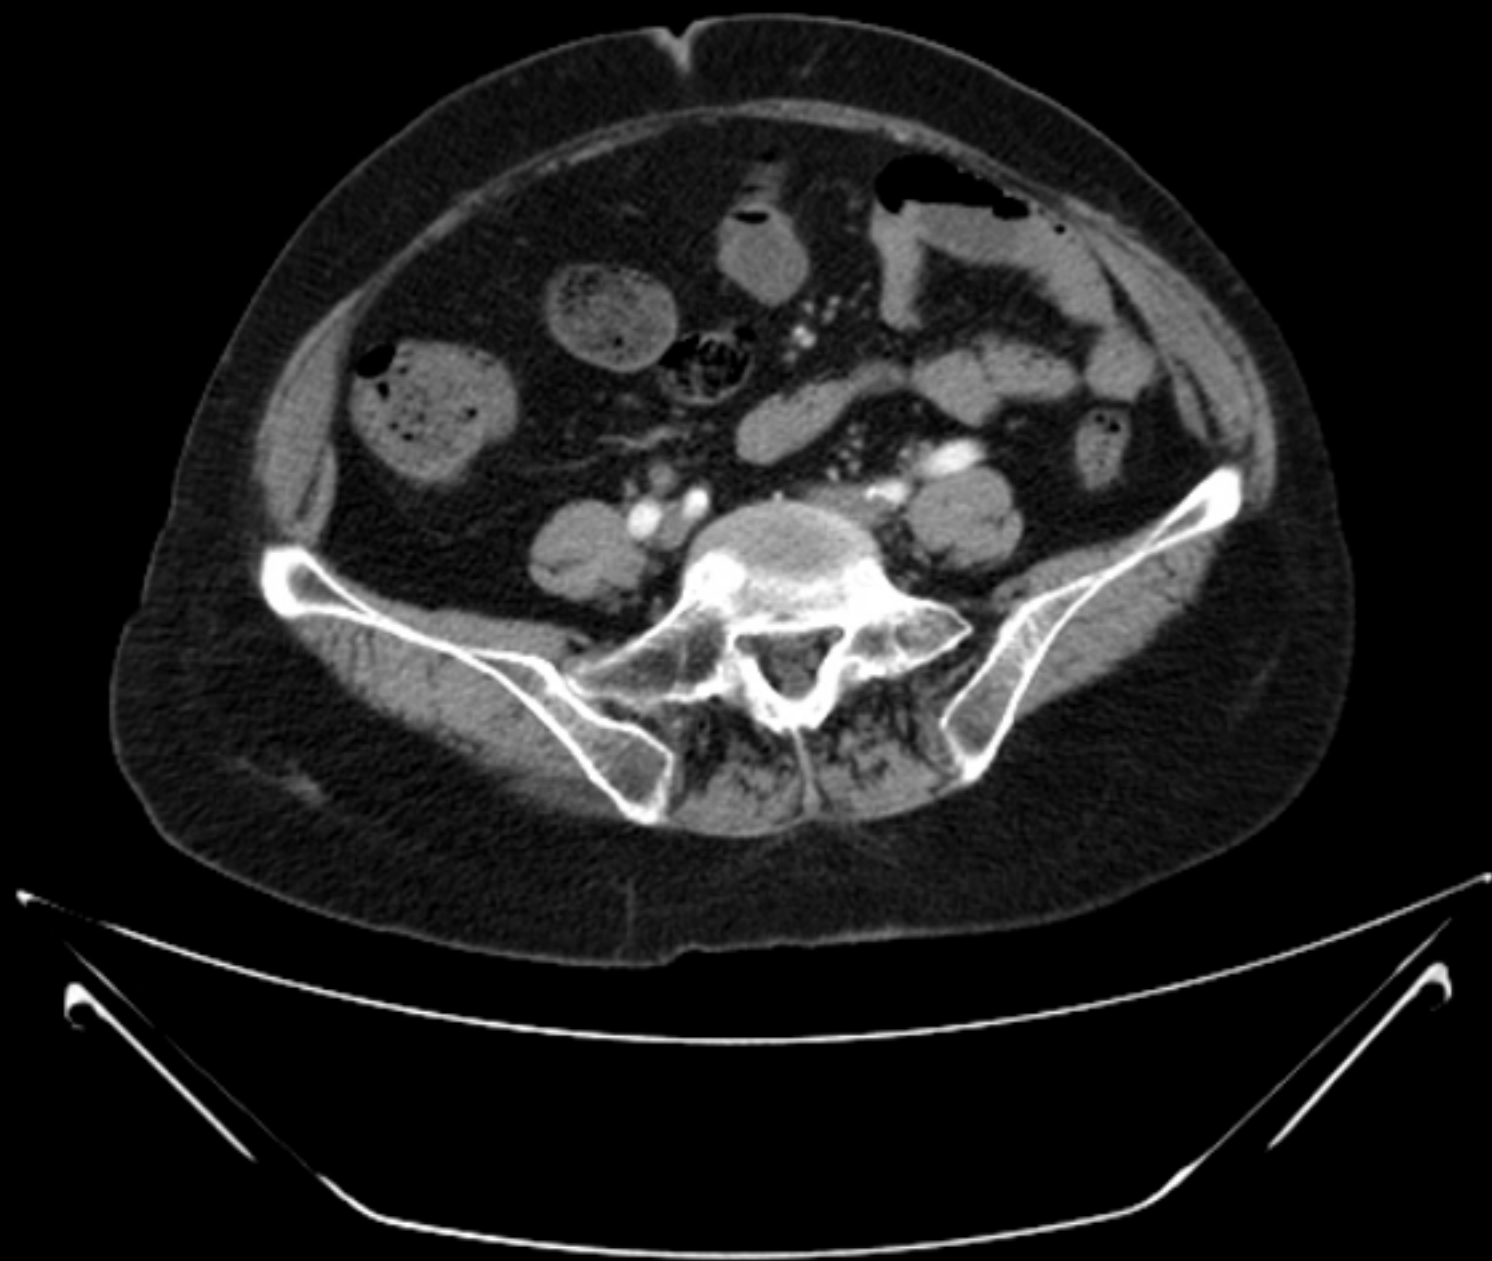

[P]

[R]

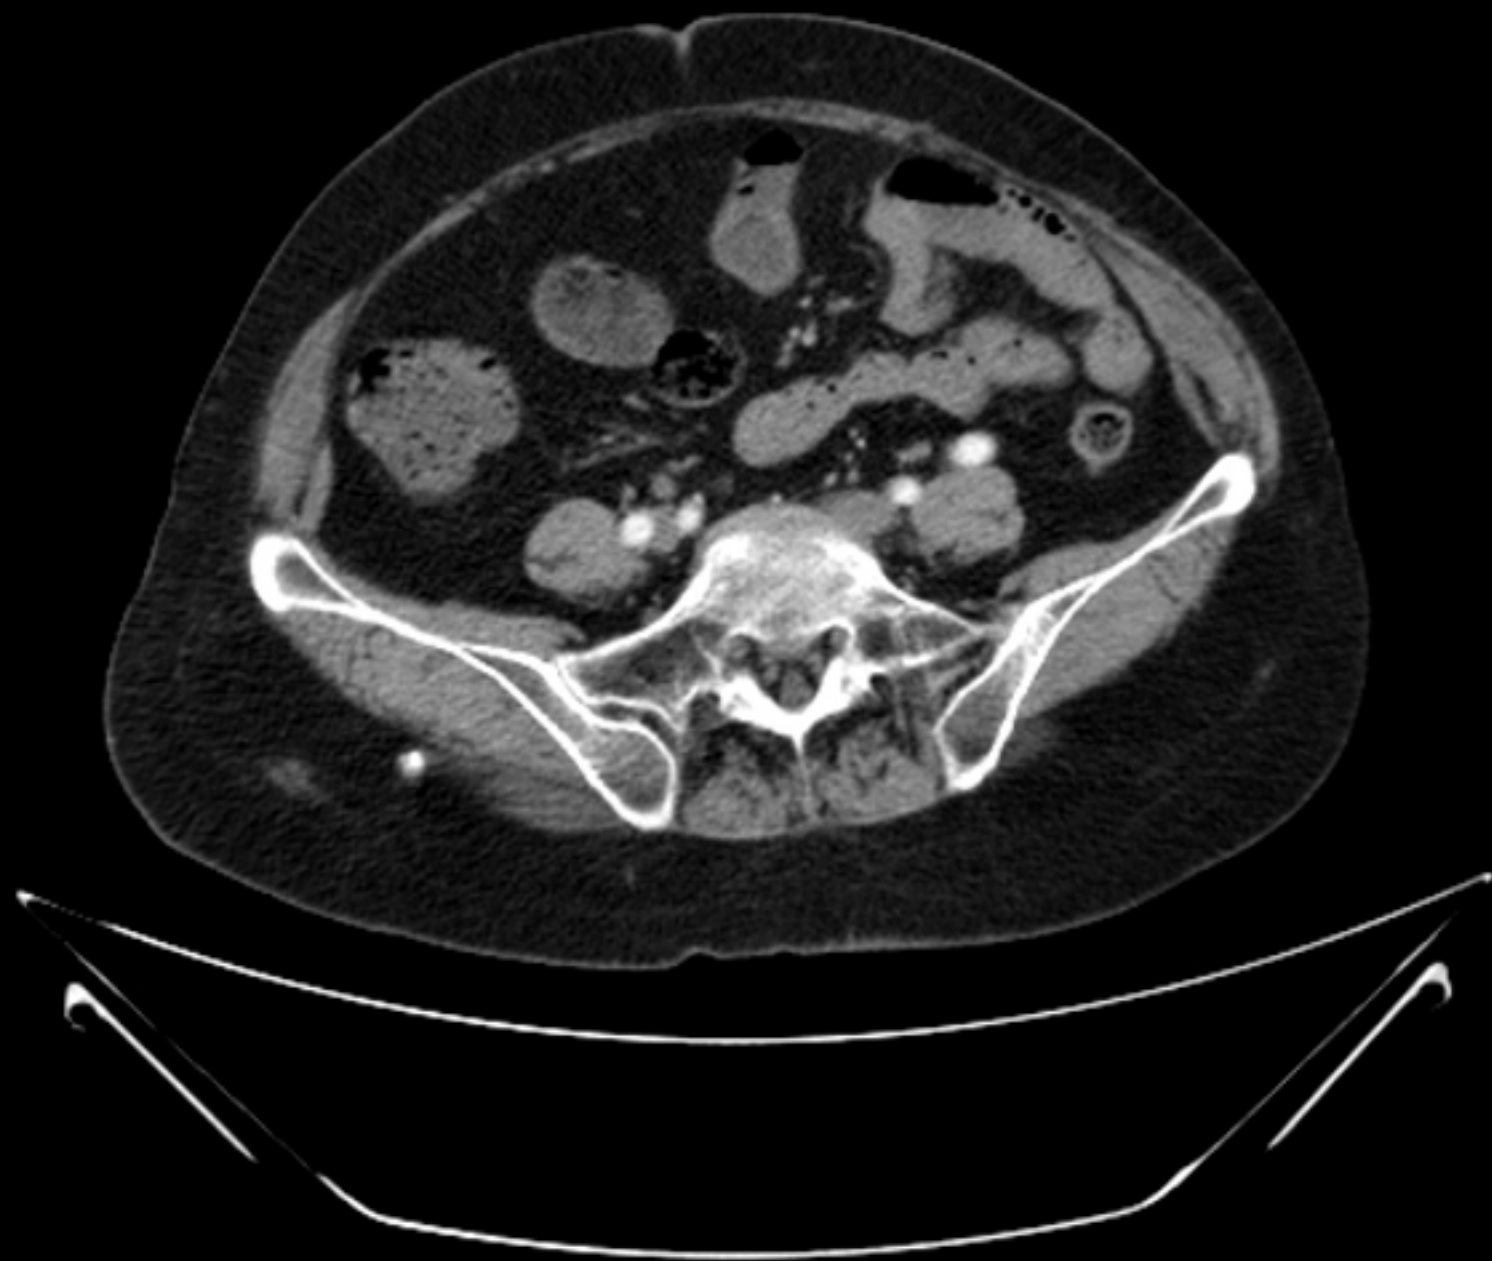

[P]



[R]

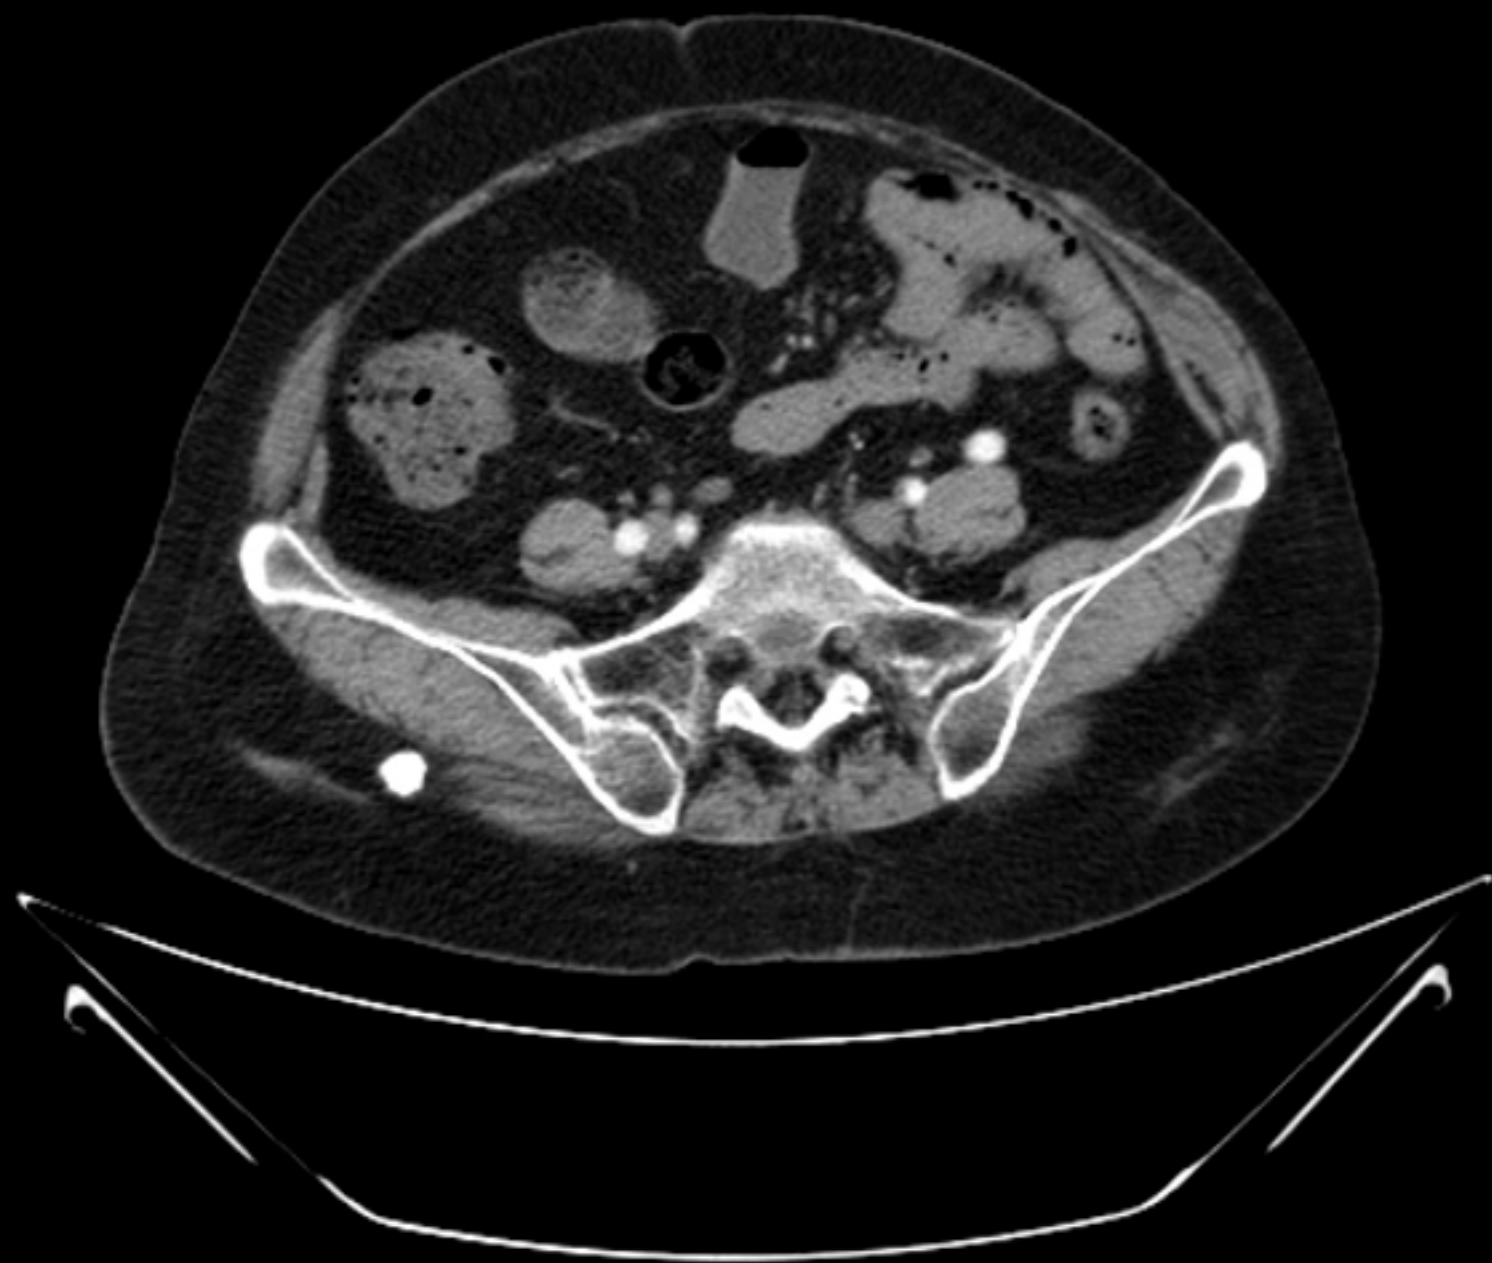

24cm

[P]

[R]

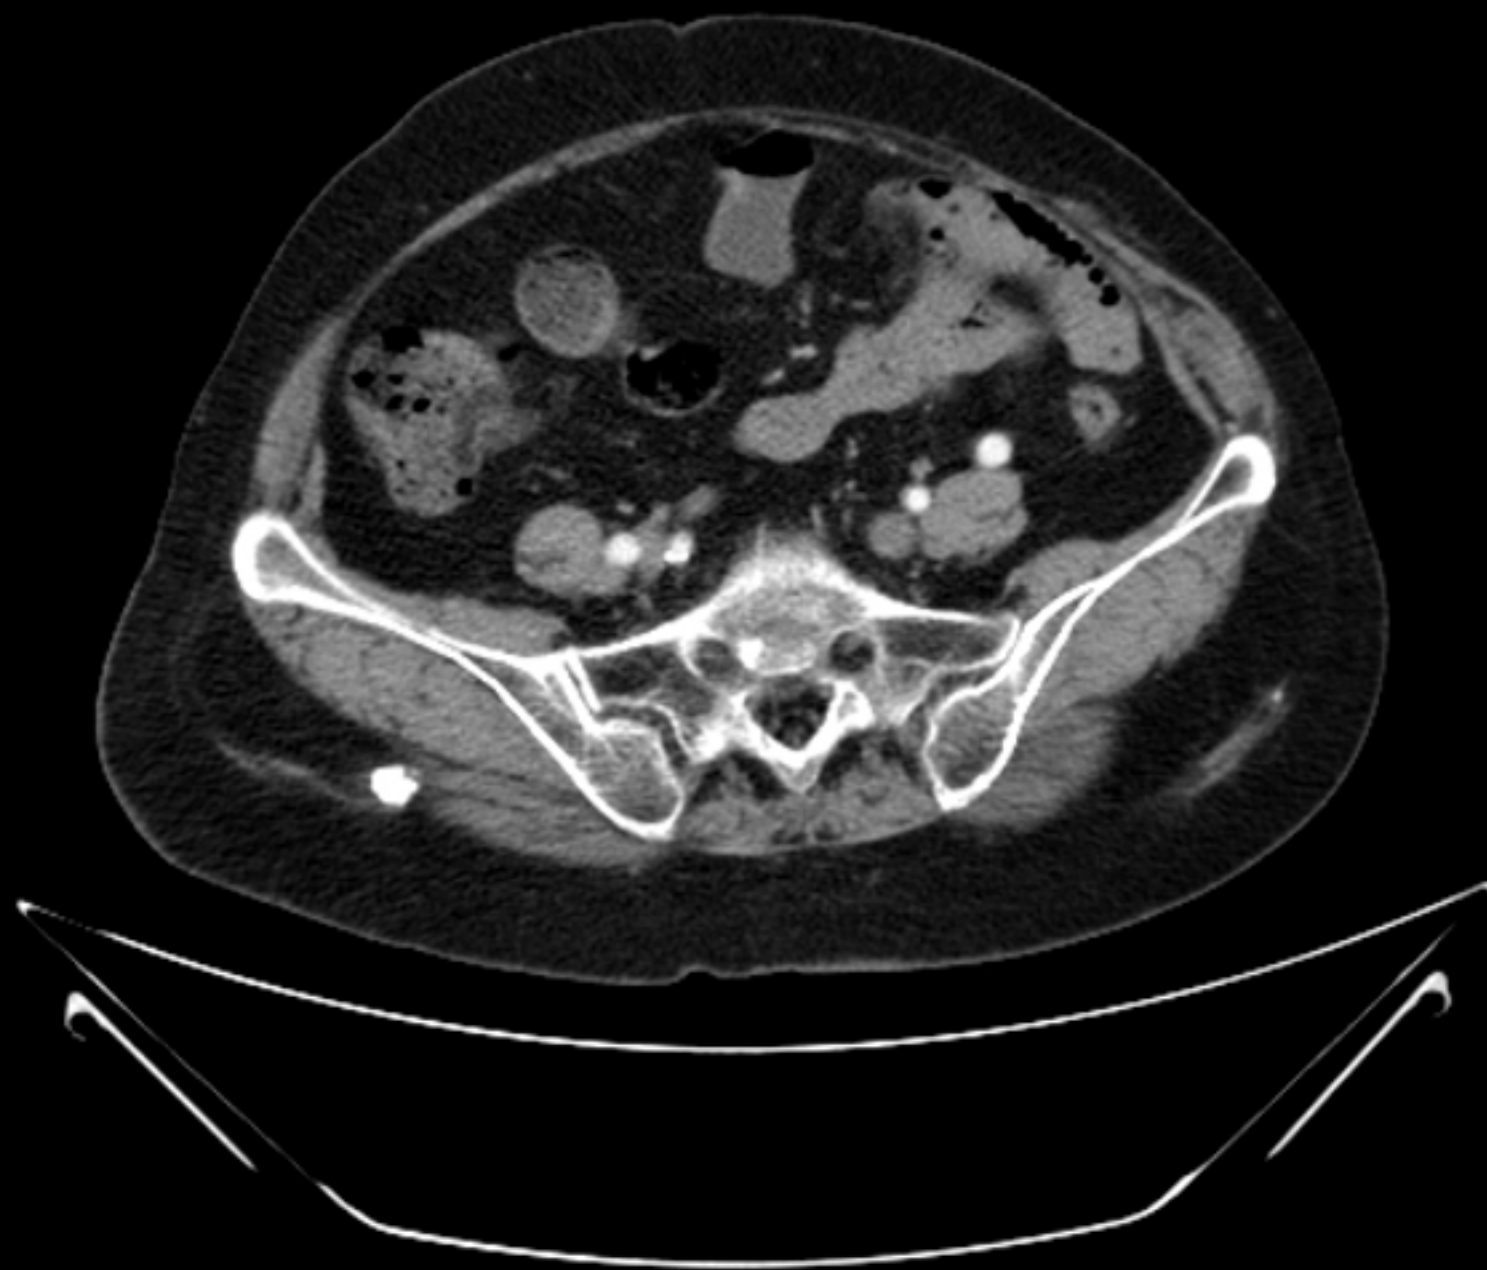

[P]

[R]

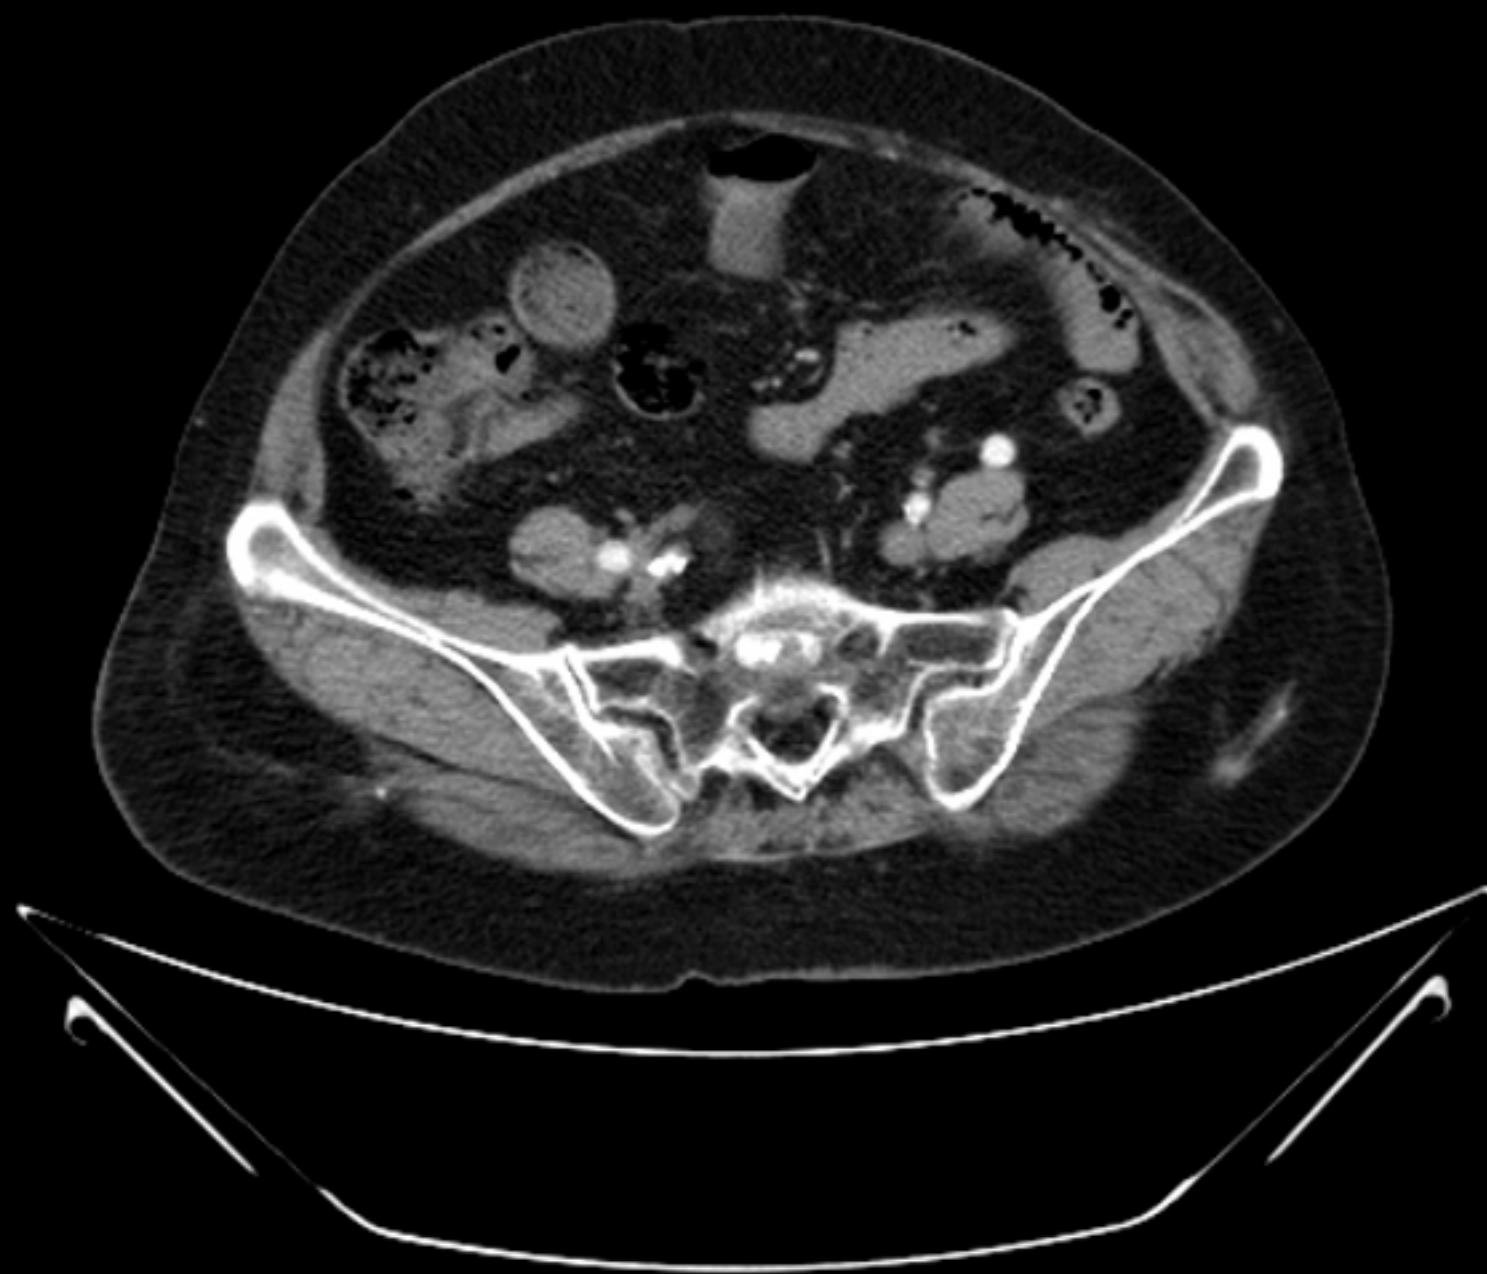

[P]

[R]

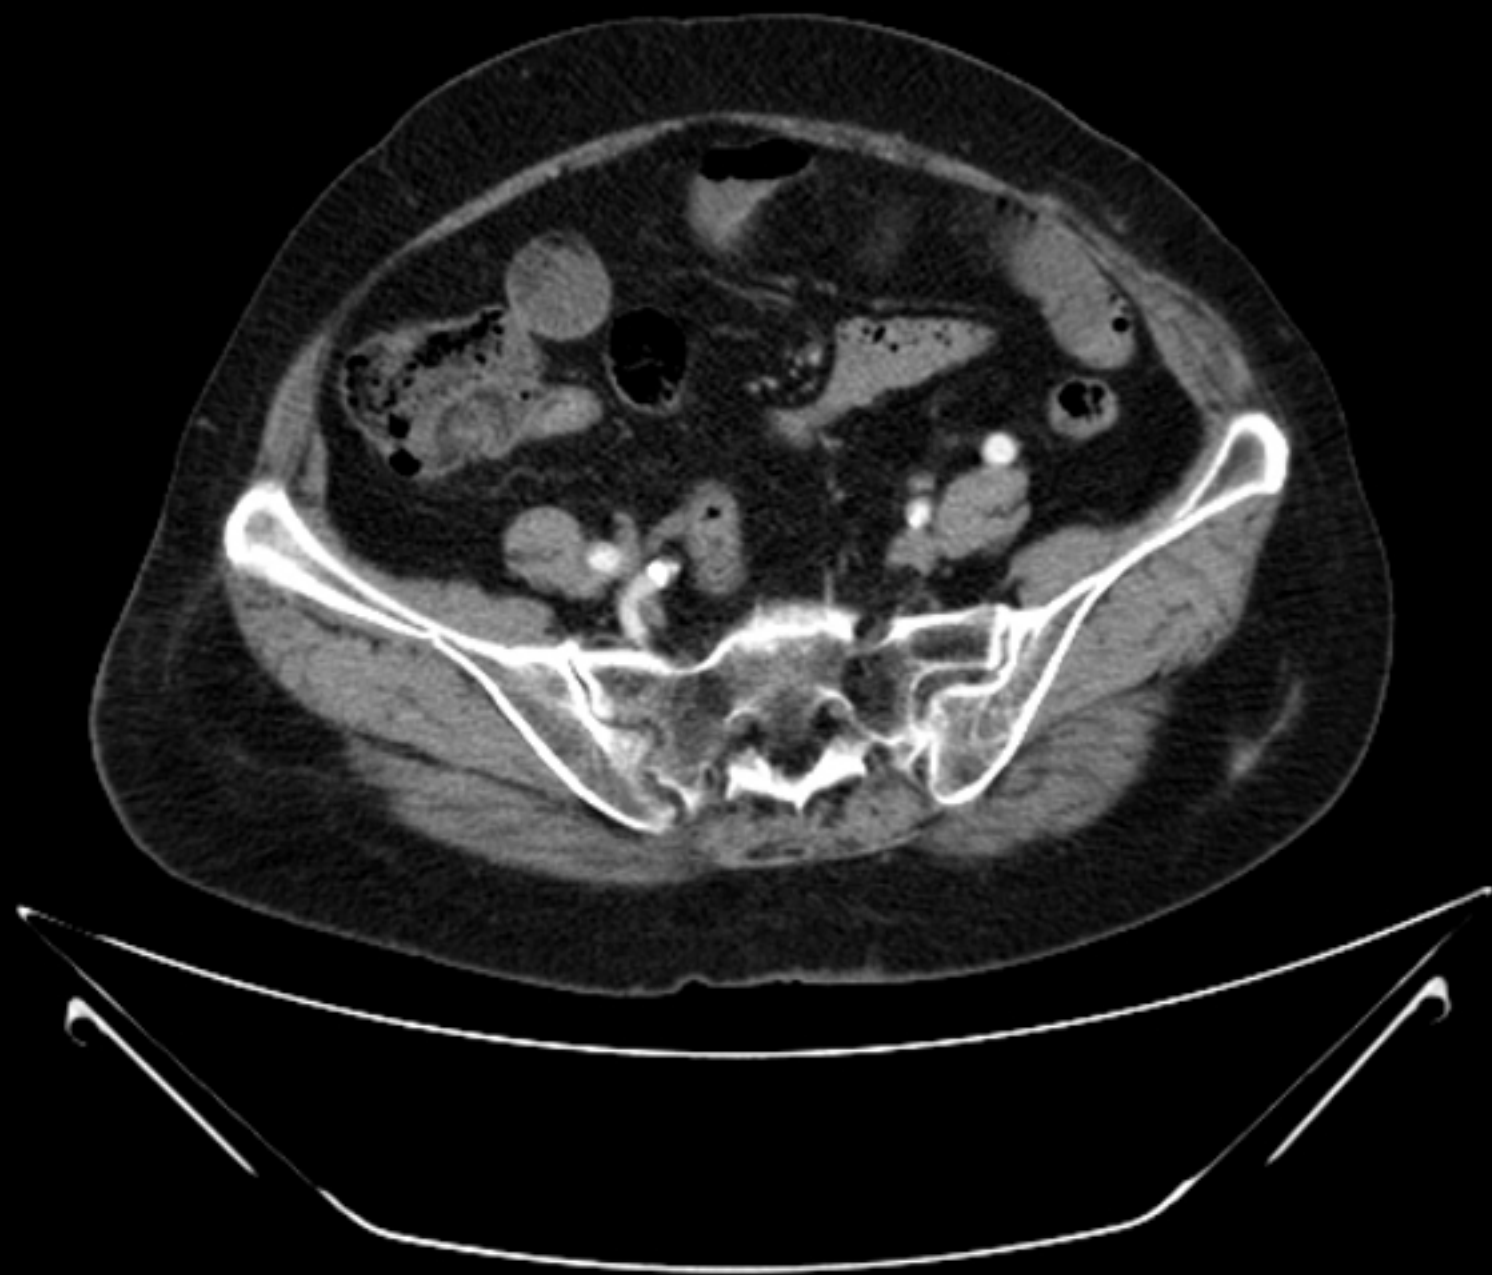

24cm

[P]

[R]

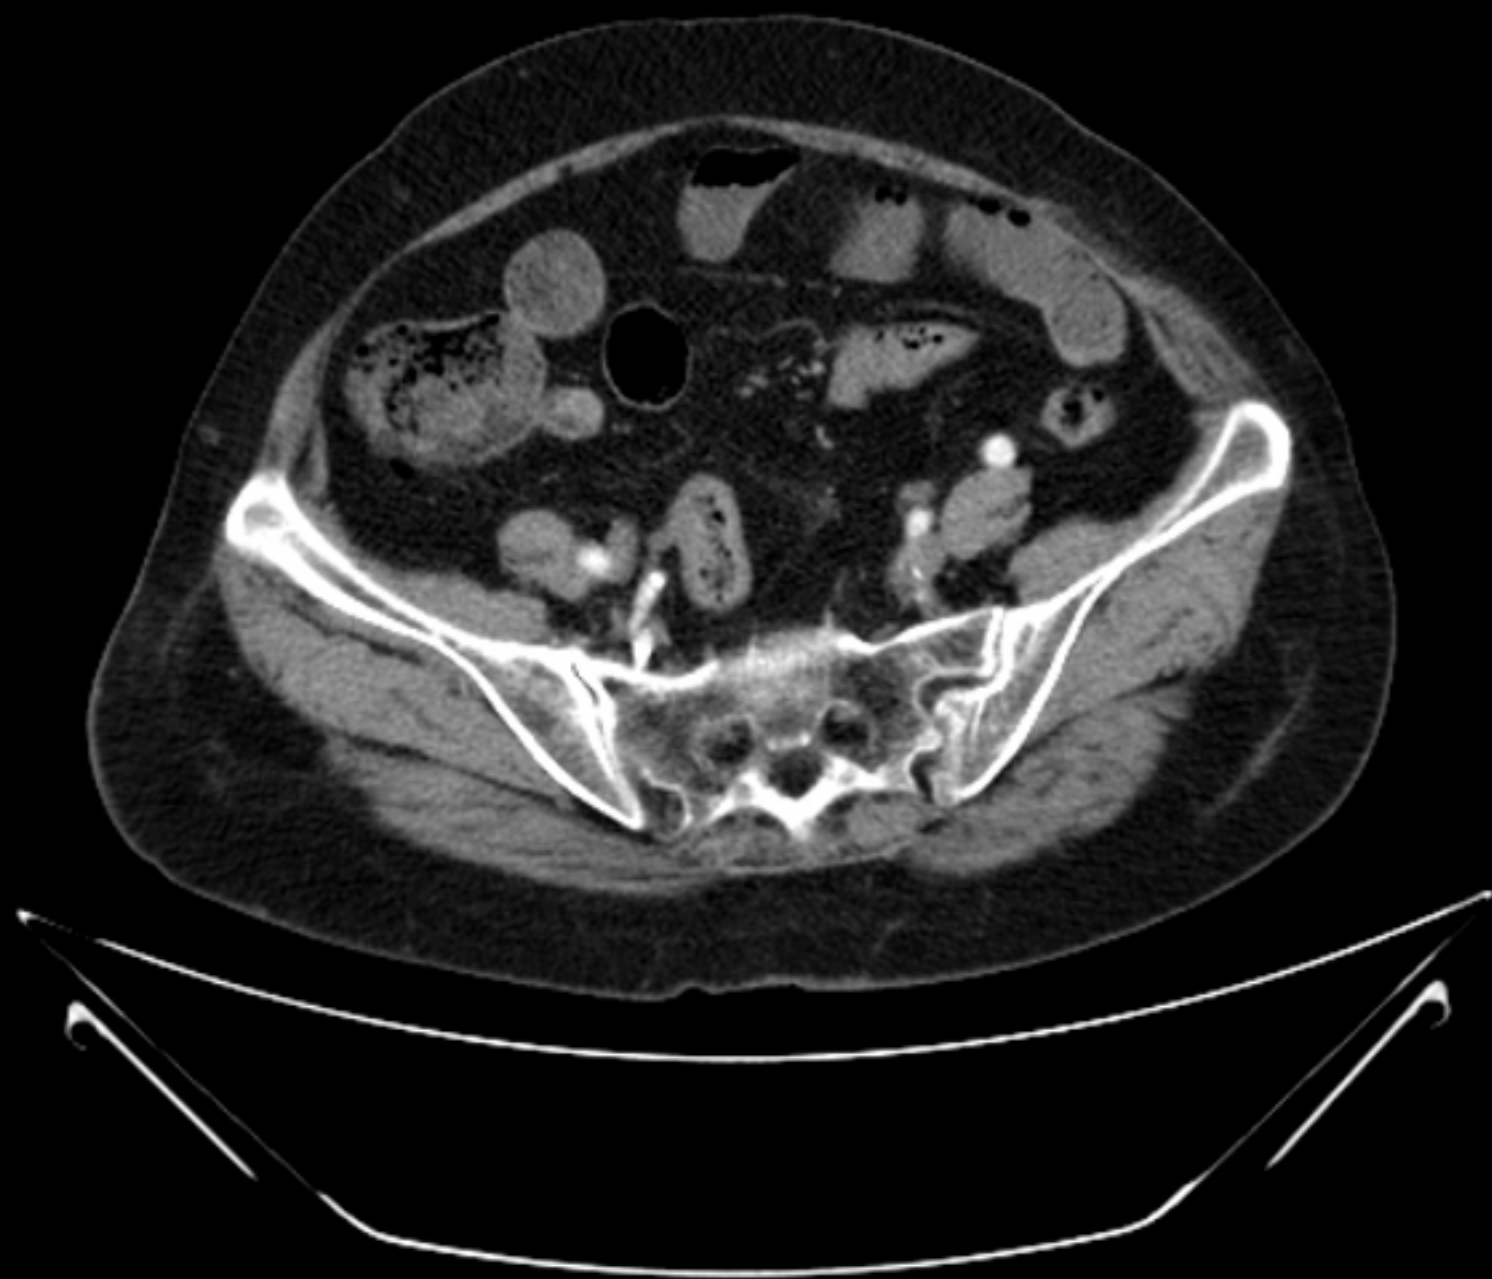

[P]



[R]

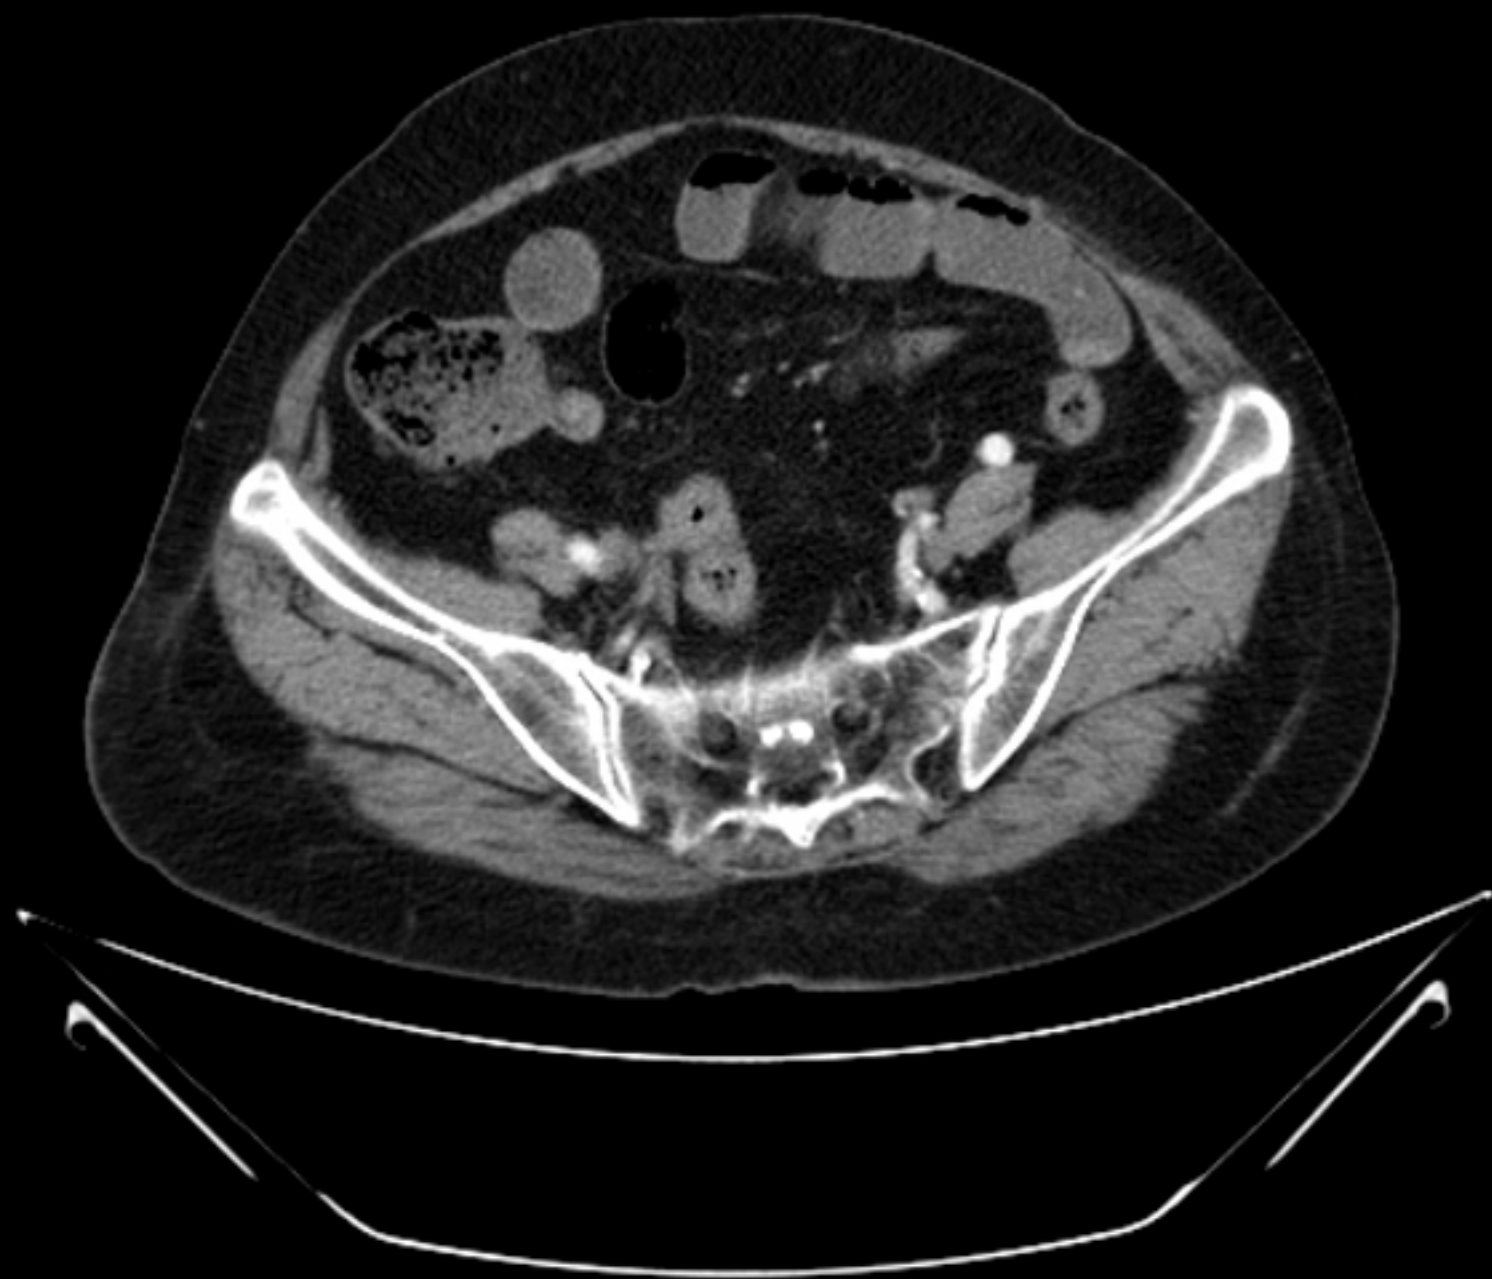

[P]



[R]

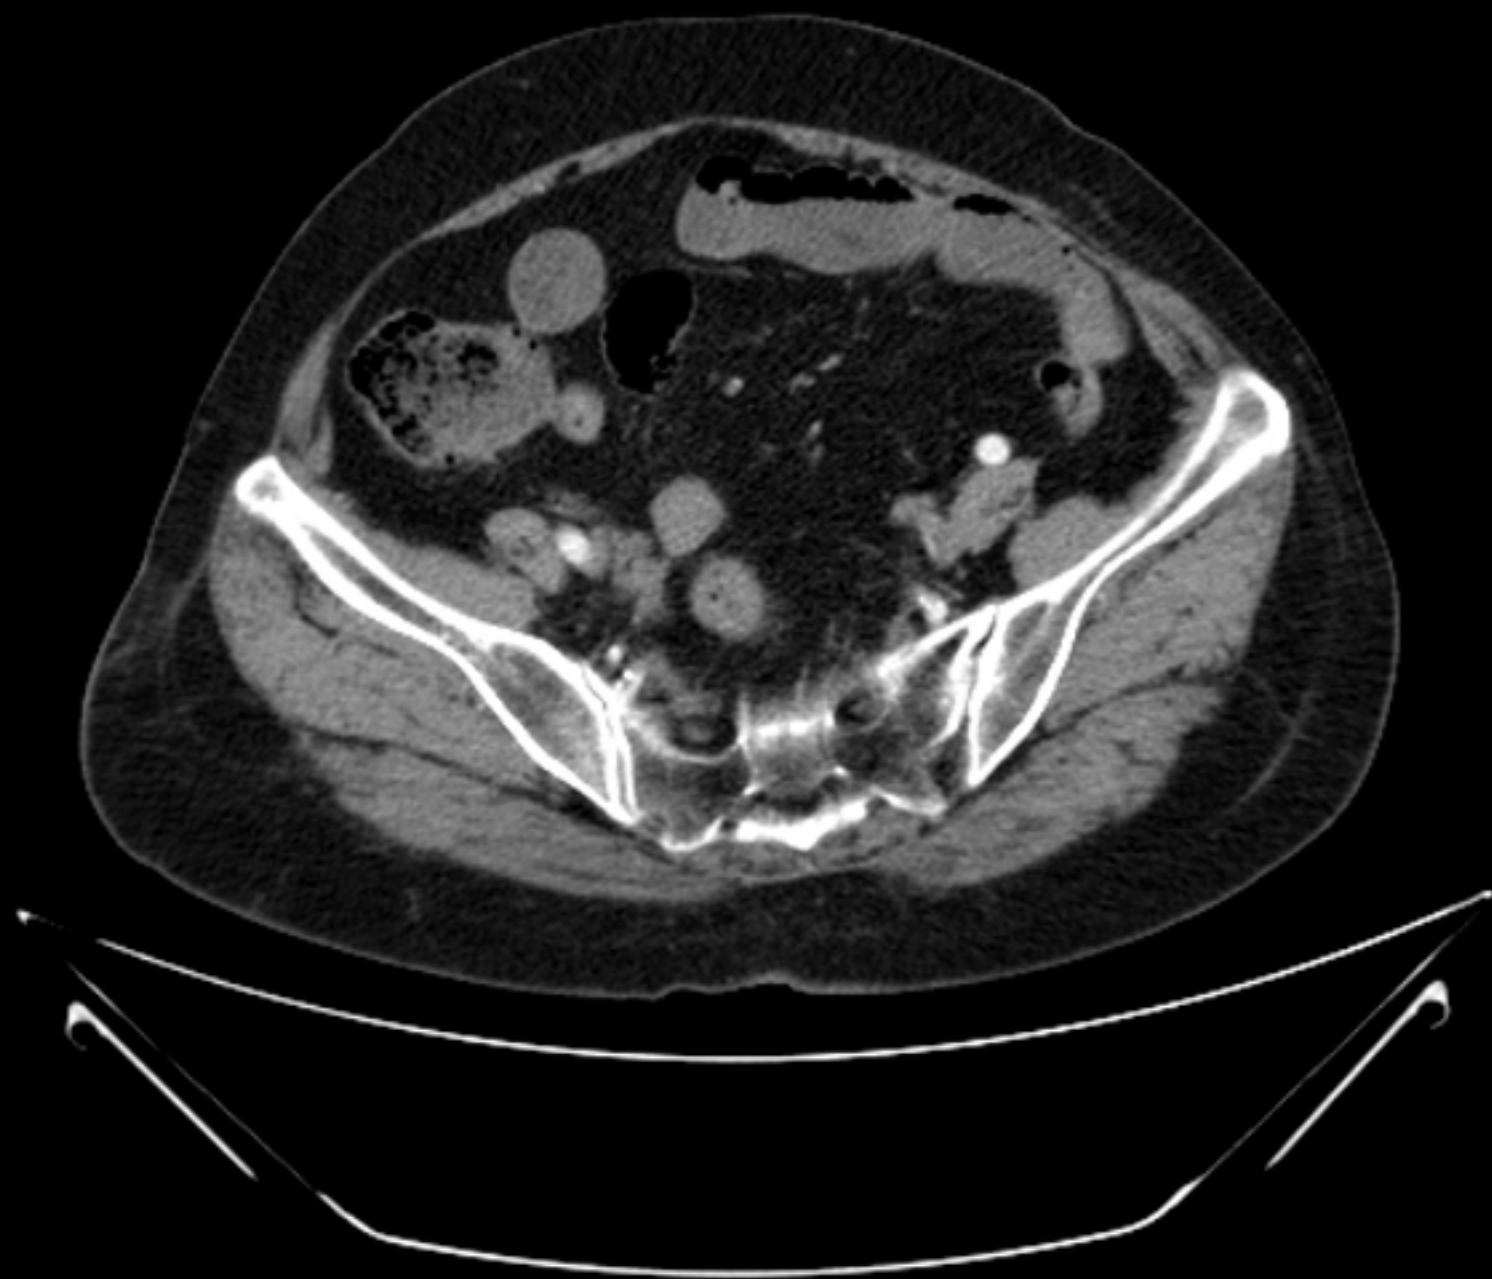

24cm

[P]

[R]

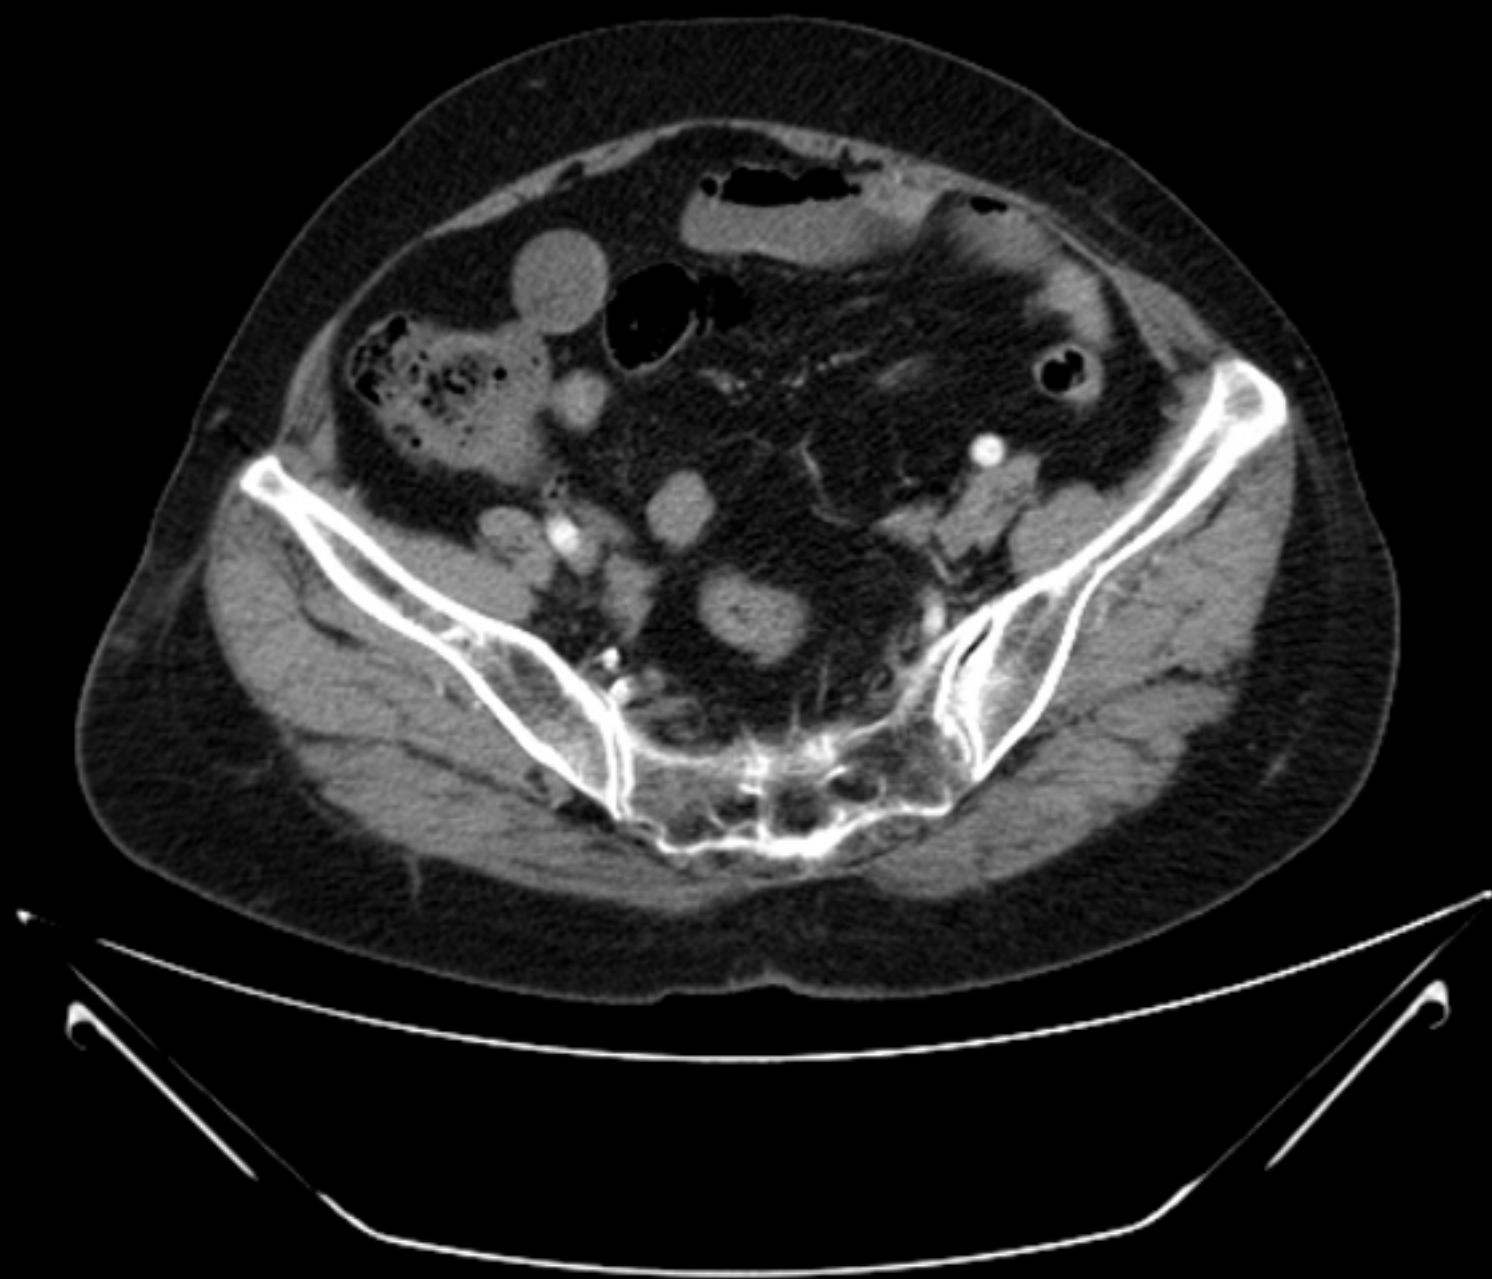

24cm

[P]
